# Supplementary material for: Intense absorption of azulene realized by molecular orbital inversion
Source: Royal Society of Chemistry journal article supplement (doi:10.1039/d3cc02311g), 2023-01-01
Supplement: d3cc02311g1.pdf [file d3cc02311g1.pdf]

## Electronic supplementary information

### Intense Absorption of Azulene Realized by Molecular Orbital Inversion

**Takahiro Tsuchiya,<sup>\*a</sup> Tomohiro Hamano,<sup>a</sup> Masahiro Inoue,<sup>a</sup> Tomoya Nakamura,<sup>b</sup>  
Atsushi Wakamiya,<sup>b</sup> and Yasuhiro Mazaki<sup>\*a</sup>**

<sup>a</sup>Department of Chemistry, Kitasato University, Kitasato 1-15-1, Sagamihara, Kanagawa  
252-0373, Japan

<sup>b</sup>Institute for Chemical Research, Kyoto University, Uji, Kyoto 611-0011, Japan

\* Corresponding author: [ttsuchi@kitasato-u.ac.jp](mailto:ttsuchi@kitasato-u.ac.jp)

## Table of Contents

|                                                                                               |     |
|-----------------------------------------------------------------------------------------------|-----|
| General Experimental Considerations .....                                                     | S2  |
| Synthetic procedures and characterization data .....                                          | S3  |
| $^1\text{H}$ and $^{13}\text{C}$ NMR spectra of <b>2a</b> .....                               | S6  |
| Solvent effect on $^1\text{H}$ NMR spectra of <b>2a</b> .....                                 | S7  |
| $^1\text{H}$ - $^1\text{H}$ COSY and NOESY NMR spectra of <b>2a</b> .....                     | S8  |
| HSQC and HMBC NMR spectra of <b>2a</b> .....                                                  | S9  |
| $^1\text{H}$ and $^{13}\text{C}$ NMR spectra of <b>2b</b> .....                               | S10 |
| $^1\text{H}$ and $^{13}\text{C}$ NMR spectra of <b>2a-Br<sub>2</sub></b> .....                | S11 |
| $^1\text{H}$ and $^{13}\text{C}$ NMR spectra of <b>2b-Br<sub>2</sub></b> .....                | S12 |
| $^1\text{H}$ and $^{13}\text{C}$ NMR spectra of <b>3a</b> .....                               | S13 |
| $^1\text{H}$ and $^{13}\text{C}$ NMR spectra of <b>3b</b> .....                               | S14 |
| <i>ORTEP</i> drawings of <b>2a</b> .....                                                      | S15 |
| <i>ORTEP</i> drawings of <b>2a-Br<sub>2</sub></b> .....                                       | S16 |
| <i>ORTEP</i> drawings of <b>2b</b> .....                                                      | S17 |
| <i>ORTEP</i> drawings of <b>2b-Br<sub>2</sub></b> .....                                       | S18 |
| MO diagrams of <b>2</b> , 2- and 6-diphenylaminoazulene, azulene and diphenylamine .....      | S19 |
| MO diagrams of <b>2</b> , <b>2-Br<sub>2</sub></b> and <b>3</b> .....                          | S20 |
| Atomic coordinates of optimized structure .....                                               | S21 |
| Redox potentials of azulene, <b>2</b> , <b>2-Br<sub>2</sub></b> and <b>3</b> .....            | S29 |
| Spin density plot of radical cation of <b>2a</b> .....                                        | S29 |
| AFM images of (a) <b>2a</b> , (b) <b>2a-Br<sub>2</sub></b> and (c) <b>2b</b> thin films ..... | S30 |



## General Experimental Considerations

$^1\text{H}$  and  $^{13}\text{C}$  NMR spectra were recorded on Bruker AVANCE-III-400 (400 MHz for  $^1\text{H}$ , 100 MHz for  $^{13}\text{C}$ ) or Bruker AVANCE-III-600 (600 MHz for  $^1\text{H}$ , 150 MHz for  $^{13}\text{C}$ ). Spectra are reported (in  $\delta$ ) referenced to internal  $\text{Me}_4\text{Si}$ . Mass spectra were recorded on Thermo Scientific, Exactive Plus Orbitrap Mass Spectrometer for electrospray ionization (ESI) and atmospheric pressure chemical ionization (APCI), or ITQ 700 GC/MS for electronic impact ionization (EI). IR spectra were recorded on JASCO FT/IR-610 Spectrometer. Melting points were determined with Yanaco melting point apparatus. Absorption spectra were recorded on Shimadzu UV-3600 spectrometer. Square wave voltammetry (SWV) and cyclic voltammetry (CV) measurements were performed on BAS Electrochemical Analyzer (Model 630E).

## Single-Crystal X-ray Diffraction

Data of **2a**, **2b**, **2a-Br<sub>2</sub>** and **2a-Br<sub>2</sub>** were collected using a Rigaku HyPix-600 diffractometer with Cu  $K\alpha$  radiation ( $\lambda = 1.54187 \text{ \AA}$ ). Single crystals were mounted on MiTeGen Dual-Thickness MicroMounts using a trace of mineral oil. Frames were collected, reflections were indexed and processed, and the files were scaled and corrected for absorption using Rigaku CrysAlis<sup>Pro</sup> program. The space groups were assigned, and the structures were solved by direct methods using *XPREP* within the *SHELXTL* suite of programs and refined by full-matrix least-squares against  $F^2$  with all reflections using *SHELXL-2018* with the graphical interface *SHELXLE*. CCDC 2254119 for **2a**, CCDC 2254124 for **2b**, CCDC 2254133 for **2a-Br<sub>2</sub>** and CCDC 2254134 for **2b-Br<sub>2</sub>** contain the supplementary crystallographic data for this paper. These data can be obtained free of charge from The Cambridge Crystallographic Data Centre.

## Thin film fabrication and characterization

The thin films of **2a**, **2a-Br<sub>2</sub>** and **2b** were prepared by the spin-coating of the solution of each compound (10 mg/mL in chlorobenzene) at 1000 rpm for 60 s. UV-Vis absorption spectra were recorded with Shimadzu UV-3600 Plus spectrometer. Atomic force microscope (AFM) images were obtained with a Molecular Imaging Picoscan Plus instrument operating in AC mode with Nanoworld NCSTR probes. Photoelectron yield spectroscopy (PYS) measurements were carried out using a BUNKOUKEIKI BIP-KV201 (accuracy:  $\pm 0.02 \text{ eV}$ , extraction voltage = 10 V) under vacuum ( $<10^{-2} \text{ Pa}$ ).

## Synthetic procedures and characterization data

### Synthesis of 2,6-bis(diarylamino)azulene (2)

A mixture of 2,6-dibromoazulene (285 mg, 1.00 mmol), diarylamine (3.00 mmol), palladium(II) acetate (12 mg, 0.05 mmol), potassium *t*-butoxide (1.57 g, 14.0 mmol) and tri-*t*-butylphosphonium tetrafluoroborate (3.0 mg, 0.01 mmol) was dissolved in toluene (30 mL), and the whole was refluxed for 2–3 h under argon atmosphere. Thereafter, the resultant mixture was diluted with toluene and H<sub>2</sub>O and filtered through celite. The toluene layer was dried over sodium sulfate, and the solution was concentrated using a rotary evaporator. The obtained crude product was purified by recrystallization from chloroform/hexane to yield as brown solids of **2a** (80%) and **2b** (82%).

**2a**: m.p. 237–239 °C; <sup>1</sup>H NMR (600 MHz, CDCl<sub>3</sub>): δ 7.62 (d, *J* = 14.4 Hz, 2H), 7.33 (d, *J* = 6.4 Hz, 8H), 7.28 (dd, *J* = 12.4, 11.1 Hz, 4H), 7.15 (quint, *J* = 6.4 Hz, 2H), 7.09 (dd, *J* = 12.9, 11.1 Hz, 4H), 7.01 (tt, *J* = 11.1, 1.7 Hz, 2H), 6.94 (d, *J* = 14.4 Hz, 2H), 6.70 (s, 2H); <sup>1</sup>H NMR (600 MHz, acetone-*d*<sub>6</sub>): δ 7.73 (d, *J* = 11.0 Hz, 2H), 7.41 (dd, *J* = 8.5, 7.4 Hz, 4H), 7.33 (dd, *J* = 8.5, 1.2 Hz, 4H), 7.31 (dd, 8.7, 7.4 Hz, 4H), 7.22 (tt, *J* = 7.4, 1.2 Hz, 2H), 7.09 (dd, *J* = 8.7, 1.2 Hz, 4H), 7.07 (tt, *J* = 7.4, 1.2 Hz, 2H), 6.92 (d, *J* = 11.0 Hz, 2H) 6.66 (s, 2H); <sup>13</sup>C NMR (150 MHz, CDCl<sub>3</sub>): δ 154.1, 151.1, 148.2, 147.0, 137.7, 129.4, 129.3, 129.3, 125.4, 124.6, 124.6, 123.2, 123.0, 107.4; IR (KBr):  $\nu_{\max}$  3032, 1585, 1486, 1455, 1310, 836, 753 cm<sup>-1</sup>; UV–Vis (THF)  $\lambda_{\max}$  (ε): 479 (31500), 365 (8610), 320 (50600) nm; HRMS (ESI-orbitrap) *m/z* calcd for C<sub>34</sub>H<sub>27</sub>N<sub>2</sub> [M + H]<sup>+</sup>: 463.2174, Found 463.2169.

**2b**: m.p. 232–235 °C; <sup>1</sup>H NMR (600 MHz, CDCl<sub>3</sub>): δ 7.53 (d, *J* = 11.2 Hz, 2H), 7.25 (d, *J* = 8.9 Hz, 4H), 7.02 (d, *J* = 9.0 Hz, 4H), 6.87 (d, *J* = 9.0 Hz, 4H), 6.83 (d, *J* = 11.2 Hz, 2H), 6.80 (d, *J* = 8.9 Hz, 4H), 6.55 (s, 2H), 3.82 (s, 6H), 3.79 (s, 6H); <sup>13</sup>C NMR (150 MHz, CDCl<sub>3</sub>): δ 156.6, 155.8, 154.3, 151.7, 141.7, 140.4, 137.0, 128.8, 126.8, 126.4, 121.0, 114.7, 114.6, 106.1, 55.5; IR (KBr):  $\nu_{\max}$  3037, 2996, 2949, 2832, 1605, 1463, 1440, 1359 cm<sup>-1</sup>; UV–Vis (THF)  $\lambda_{\max}$  (ε): 488 (31700), 382 (8110), 323 (50800), 287 (21000) nm; HRMS (ESI-orbitrap) *m/z*: C<sub>38</sub>H<sub>35</sub>N<sub>2</sub>O<sub>4</sub> [M + H]<sup>+</sup>: 583.2597, Found 583.2591. Anal. Calcd for C<sub>38</sub>H<sub>34</sub>N<sub>2</sub>O<sub>4</sub>: C, 78.33; H, 5.88; N, 4.81. Found: C, 78.41; H, 5.70; N, 4.86.

### Synthesis of 1,3-dibromo-2,6-bis(diarylamino)azulene (2-Br<sub>2</sub>)

To a dichloromethane (5 mL) solution of **2** (0.45 mmol) was slowly dropped a dichloromethane (15 mL) solution of *N*-bromosuccinimide (165 mg, 0.93 mmol) at  $-78\text{ }^{\circ}\text{C}$  under argon. After completion of the dropwise addition, the mixture was stirred for 2 hours. Thereafter, a saturated aqueous solution of sodium hydrogen carbonate was added, and the dichloromethane layer was washed with brine. After the dichloromethane solution was dried over sodium sulfate. The resultant solution was filtered through aluminium oxide. After concentration with a rotary evaporator, reddish-orange solids of **2a-Br<sub>2</sub>** (82%) and **2b-Br<sub>2</sub>** (84%) were obtained.

**2a-Br<sub>2</sub>**: m.p. 236–239  $^{\circ}\text{C}$ ;  $^1\text{H}$  NMR (600 MHz,  $\text{CDCl}_3$ ):  $\delta$  7.88 (d,  $J = 11.3$  Hz, 2H), 7.35 (dd,  $J = 8.7, 7.2$  Hz, 4H), 7.23 (dd,  $J = 8.7, 7.3$  Hz, 4H), 7.21–7.18 (m, 6H), 7.06 (dd,  $J = 8.7, 1.1$  Hz, 4H), 6.98 (tt,  $J = 7.3, 1.1$  Hz, 2H), 6.95 (d,  $J = 11.3$  Hz, 2H);  $^{13}\text{C}$  NMR (150 MHz,  $\text{CDCl}_3$ ):  $\delta$  157.7, 146.7, 146.2, 144.2, 133.3, 131.3, 129.9, 128.9, 126.5, 125.6, 122.2, 122.1, 119.0, 102.1; IR (KBr):  $\nu_{\text{max}}$  3034, 1575, 1488, 1451, 1318, 695  $\text{cm}^{-1}$ ; UV–Vis (THF)  $\lambda_{\text{max}}$  ( $\epsilon$ ): 299 (28500), 349 (41400), 492 (28300); HRMS (ESI-orbitrap)  $m/z$  :  $\text{C}_{34}\text{H}_{25}\text{Br}_2\text{N}_2$  [ $\text{M} + \text{H}$ ] $^+$ : 619.0384, Found 619.0359; Anal. Calcd for  $\text{C}_{34}\text{H}_{24}\text{Br}_2\text{N}_2$ ; C, 65.83; H, 3.90; N, 4.52. Found: C, 65.56; H, 3.78; N, 4.59.

**2b-Br<sub>2</sub>**: m.p. 230–232  $^{\circ}\text{C}$ ;  $^1\text{H}$  NMR (600 MHz,  $\text{CDCl}_3$ )  $\delta$  7.78 (d,  $J = 11.1$  Hz, 2H), 7.12 (d,  $J = 7.4$  Hz, 4H), 6.96 (d,  $J = 7.6$  Hz, 4H), 6.89 (d,  $J = 7.4$  Hz, 4H), 6.82 (d,  $J = 11.1$  Hz, 2H), 6.77 (d,  $J = 7.6$  Hz, 4H), 3.82 (s, 6H), 3.77 (s, 6H);  $^{13}\text{C}$  NMR (150 MHz  $\text{CDCl}_3$ )  $\delta$  157.8, 157.6, 154.8, 140.5, 139.5, 135.2, 132.8, 130.5, 128.0, 123.4, 116.9, 115.2, 114.2, 101.4, 55.5, 55.5; IR (KBr):  $\nu_{\text{max}}$  3037, 2996, 2931, 2833, 2361, 1583, 1505, 1398, 1320, 1287, 1241, 1034, 870, 828, 721, 552  $\text{cm}^{-1}$ ; UV–Vis (THF)  $\lambda_{\text{max}}$  ( $\epsilon$ ): 313 (43200), 372 (47900), 516 (34600); HRMS (ESI-orbitrap)  $m/z$  calcd. for  $\text{C}_{38}\text{H}_{32}\text{N}_2\text{O}_4\text{Br}_2$  [ $\text{M} + \text{H}$ ] $^+$ : 739.0807, Found 739.0801.

### Synthesis of 1,3-dimethoxy-2,6-bis(diarylamino)azulene (3)

To a mixture of **2-Br<sub>2</sub>** (0.24 mmol), copper(I) bromide (38 mg, 0.27 mmol) in *N,N*-dimethylformamide (7.5 mL) and methanol (5 mL), methanol (10 mL) solution of sodium methoxide (4.8 g, 88.8 mmol) was added, and the mixture was stirred for 1 week at 100 °C under argon. Thereafter, water was added to the resultant mixture, and the mixture was filtered through celite. After extraction with ethyl acetate, the organic layer was dried over sodium sulfate, and the solution was concentrated using a rotary evaporator. The obtained crude product was purified by preparative gel permeation chromatography with chloroform to obtain yellowish-brown solids of **3a** (74%) and reddish-brown solids of **3b** (58%). The tailing phenomena were appeared for the performing thin layer chromatography (TLC) on the compounds.

**3a**: m.p. 238–241 °C; <sup>1</sup>H NMR (600 MHz, CDCl<sub>3</sub>) δ 7.80 (d, *J* = 11.2 Hz, 2H), 7.31–7.24 (m, 8H), 7.17–7.14 (m, 8H), 7.09 (tt, *J* = 7.4, 1.2 Hz, 2H), 7.02 (tt, *J* = 7.3, 1.2 Hz, 2H), 6.57 (d, *J* = 11.2 Hz, 2H), 3.62 (s, 6H); <sup>13</sup>C NMR (150 MHz CDCl<sub>3</sub>) δ 156.3, 147.7, 146.0, 140.5, 129.6, 129.4, 129.2, 129.0, 125.7, 124.0, 122.7, 121.8, 117.6, 117.1, 62.2; IR (KBr):  $\nu_{\max}$  3033, 2956, 2924, 2853, 1937, 1729, 1587, 1572, 1488, 1392, 1290, 1274, 1060, 1033, 753, 696; UV–Vis (THF)  $\lambda_{\max}$  (ε): 297 (30600), 342 (42400), 353 (42500), 494 (31000); HRMS (ESI-orbitrap) *m/z* calcd. for C<sub>36</sub>H<sub>30</sub>N<sub>2</sub>O<sub>2</sub> M<sup>+</sup>: 522.2307, Found 522.2307.

**3b**: m.p. 235–236 °C; <sup>1</sup>H NMR (600 MHz, CDCl<sub>3</sub>) δ 7.71 (d, *J* = 11.1 Hz, 2H), 7.08 (d, *J* = 8.9 Hz, 4H), 7.05 (d, *J* = 8.9 Hz, 4H), 6.84 (d, *J* = 8.9 Hz, 4H), 6.80 (d, *J* = 8.9 Hz, 4H), 6.46 (d, 11.1, 2H) 3.81(s, 6H), 3.79 (s,6H), 3.60 (s, 6H); <sup>13</sup>C NMR (150 MHz, CDCl<sub>3</sub>) δ 156.7, 156.6, 155.2, 141.0, 140.2, 140.2, 129.4, 128.7, 127.6, 123.0, 116.9, 114.9, 114.9, 114.4, 62.4, 55.6, 55.6; IR (KBr):  $\nu_{\max}$  2939, 2929, 2833, 1582, 1502, 1397, 1287, 1242, 1034, 827, 555 cm<sup>-1</sup>; UV–Vis (THF)  $\lambda_{\max}$  (ε): 283 (42298), 344 (55978), 347 (55978), 506 (37308); HRMS (ESI-orbitrap) *m/z* calcd. for C<sub>40</sub>H<sub>38</sub>N<sub>2</sub>O<sub>6</sub> M<sup>+</sup>: 642.2729, Found 642.2725.

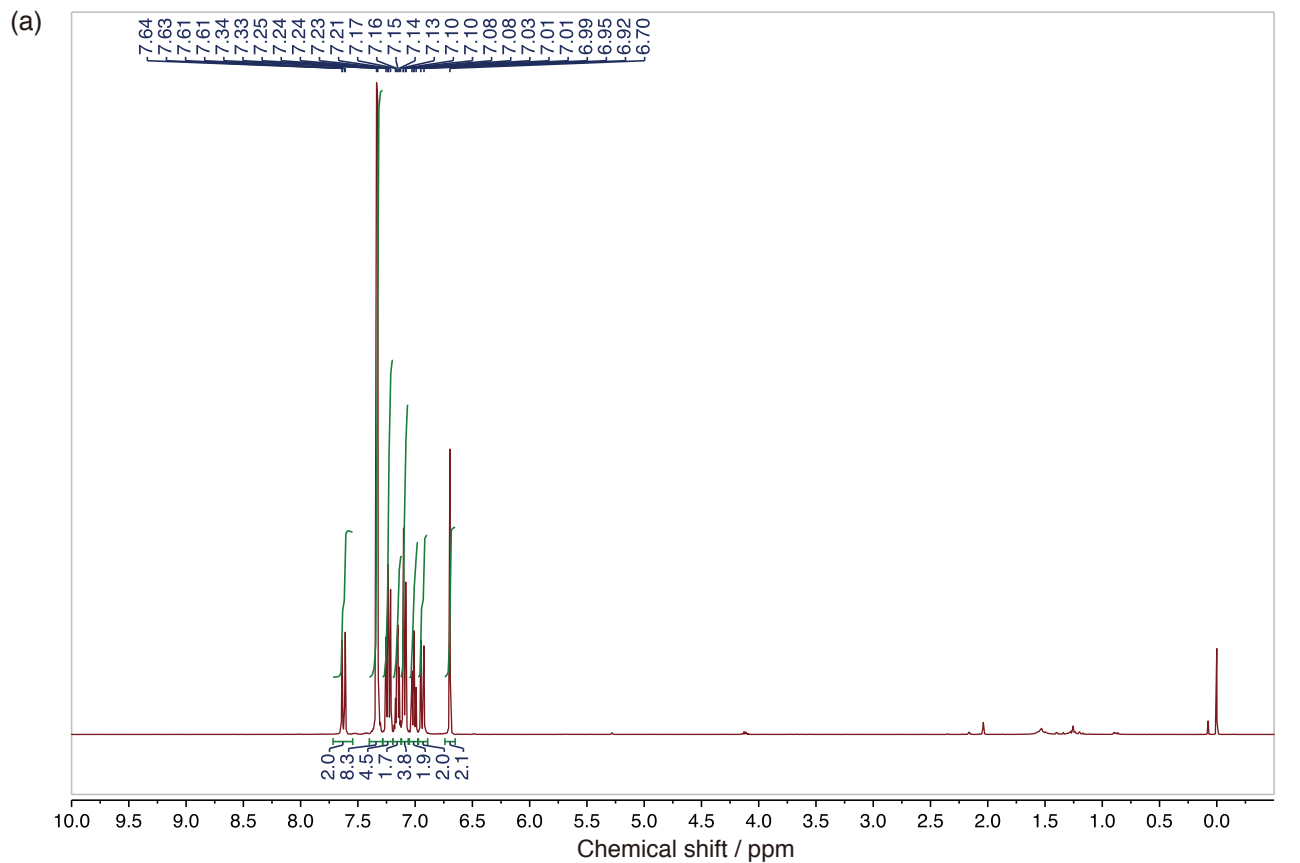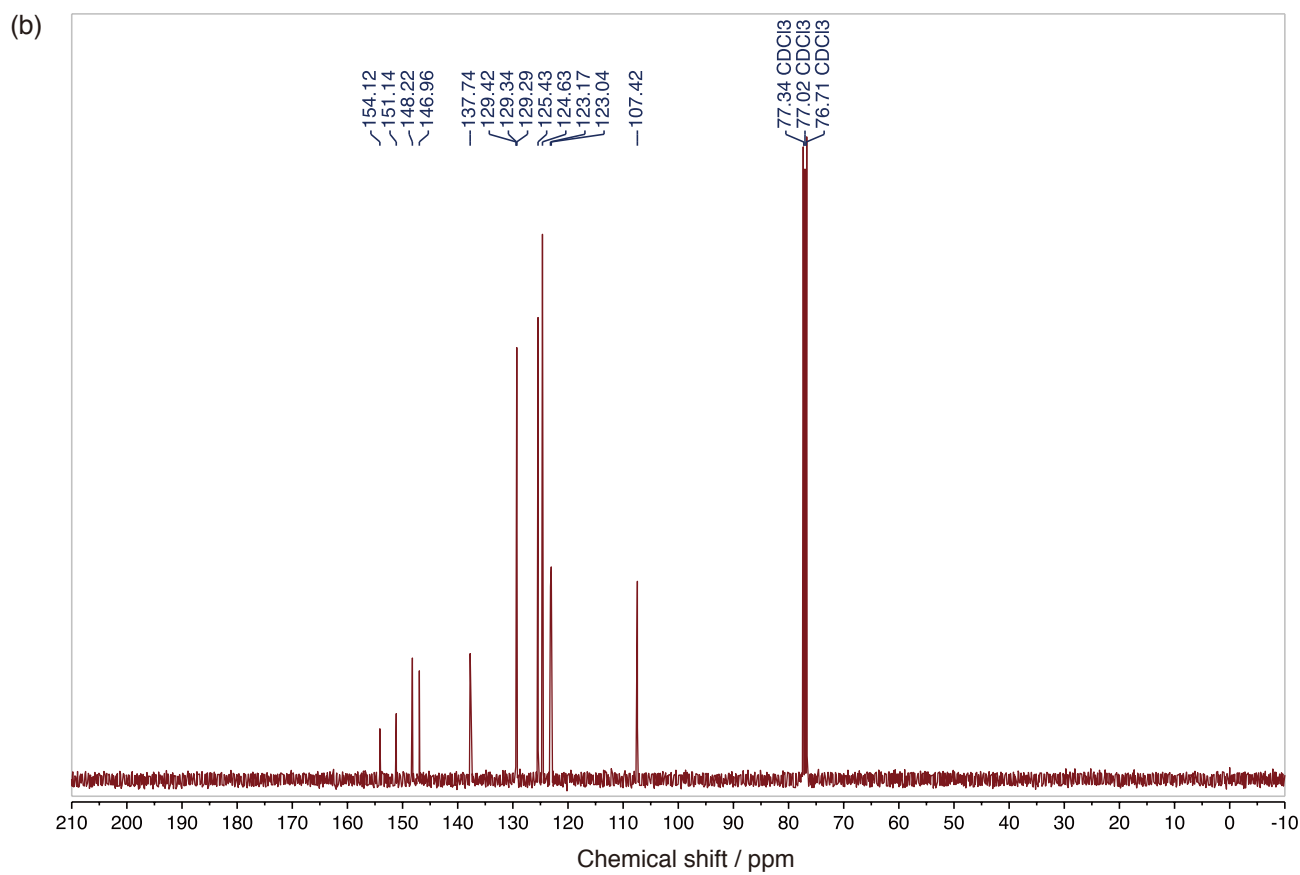

Figure S1. (a)  $^1\text{H}$  and (b)  $^{13}\text{C}$  NMR spectra of **2a**.

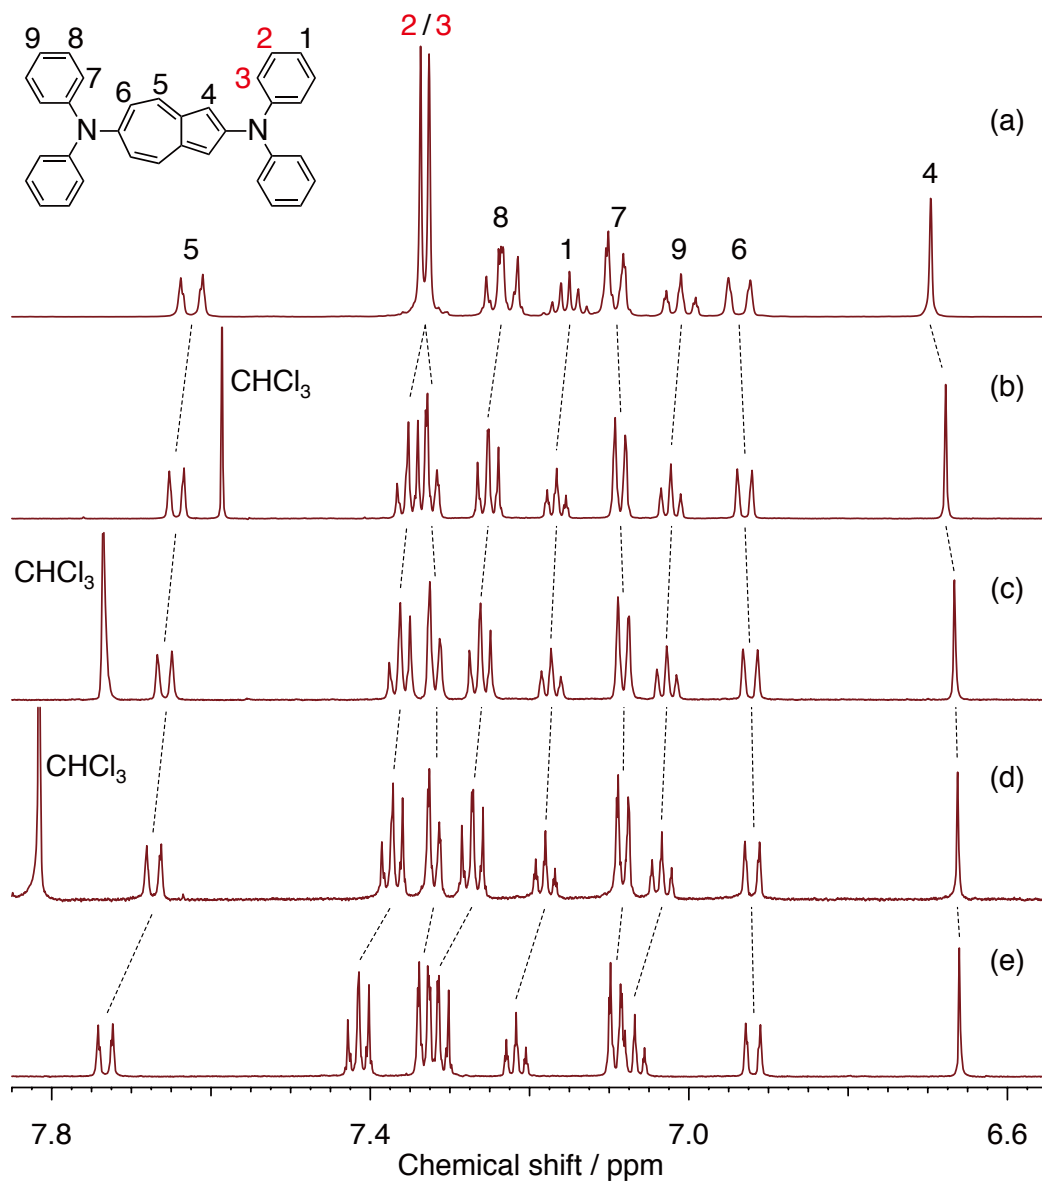

**Figure S2.**  $^1\text{H}$  NMR spectra of **2a** in (a)  $\text{CDCl}_3$ , (b)  $\text{CDCl}_3 / \text{acetone-}d_6 = 2:1$ , (c)  $\text{CDCl}_3 / \text{acetone-}d_6 = 1:1$ , (d)  $\text{CDCl}_3 / \text{acetone-}d_6 = 1:2$  and (e)  $\text{acetone-}d_6$ .

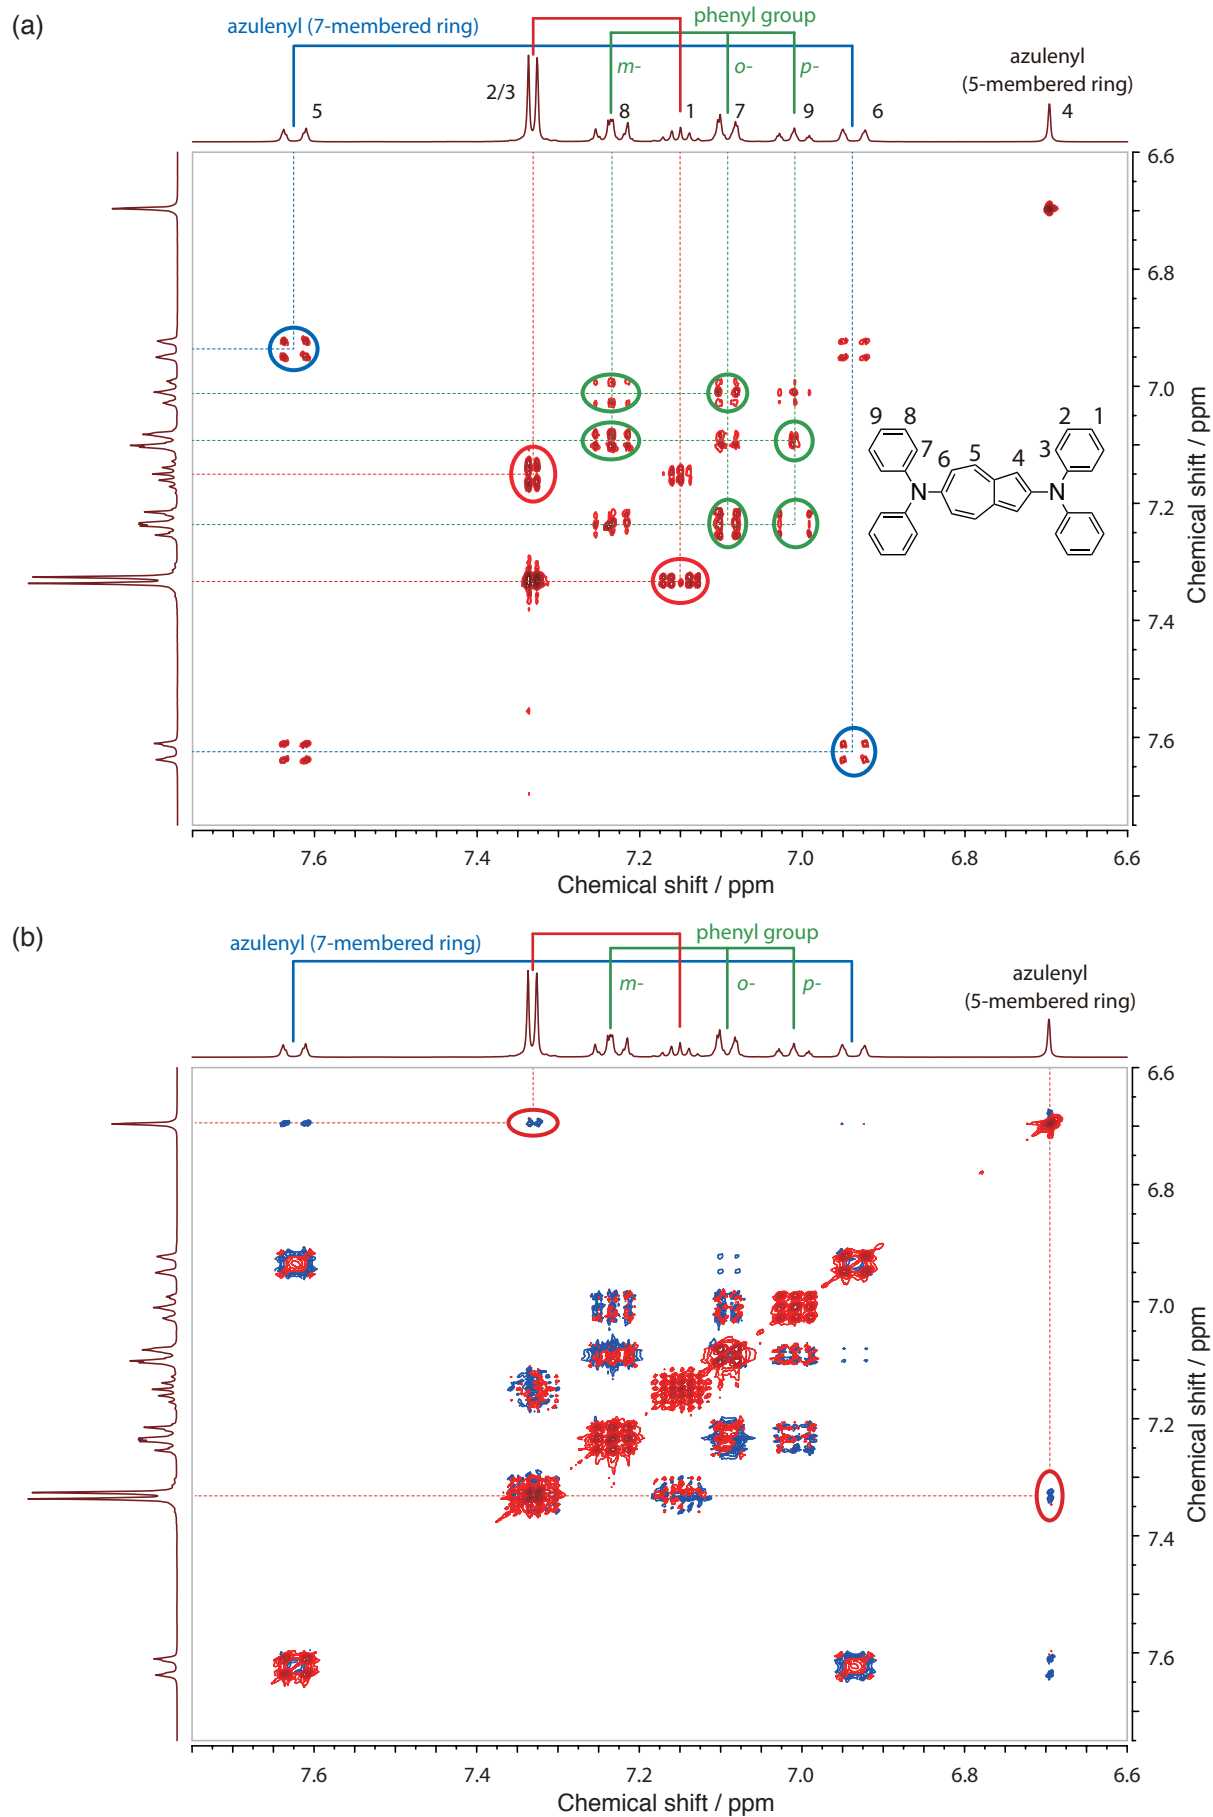

**Figure S3.** (a)  $^1\text{H}$ - $^1\text{H}$  COSY and (b) NOESY NMR spectra of **2a**.

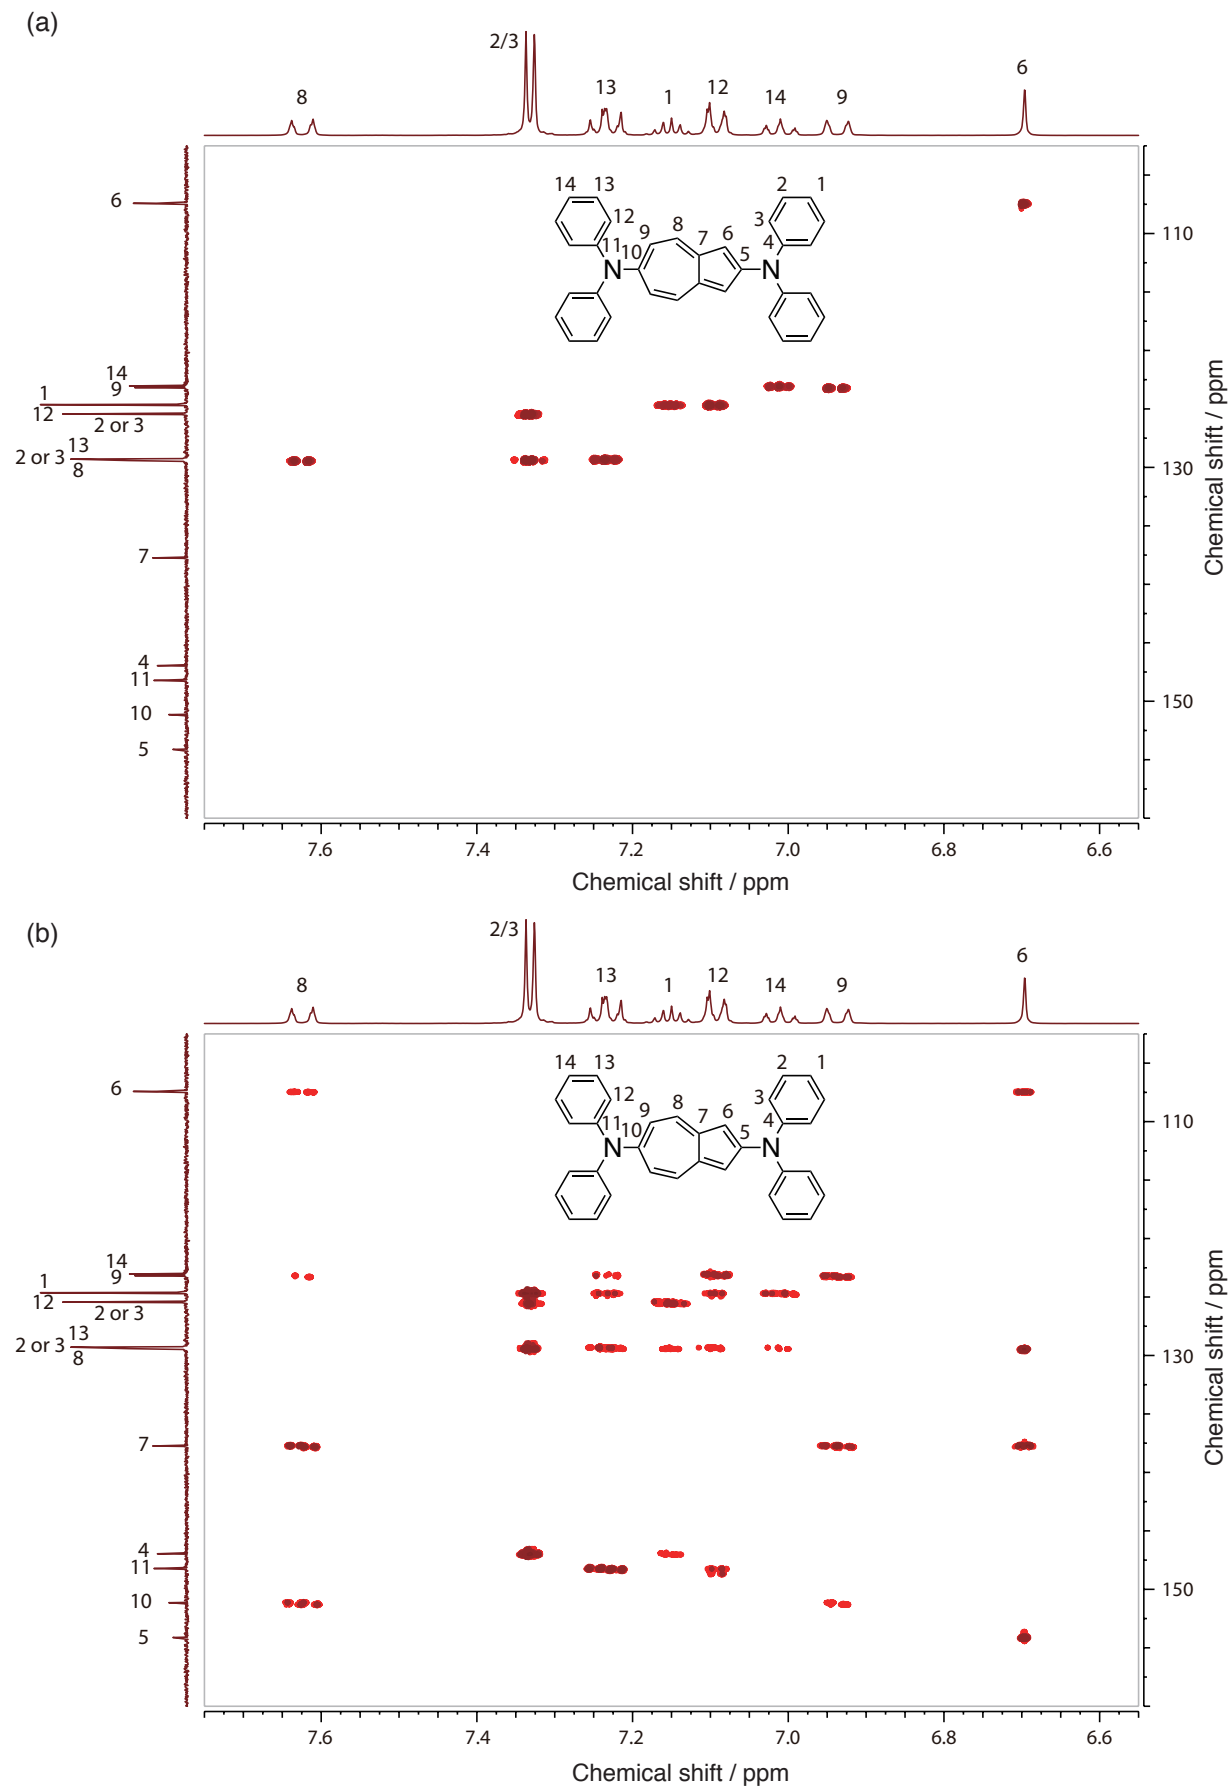



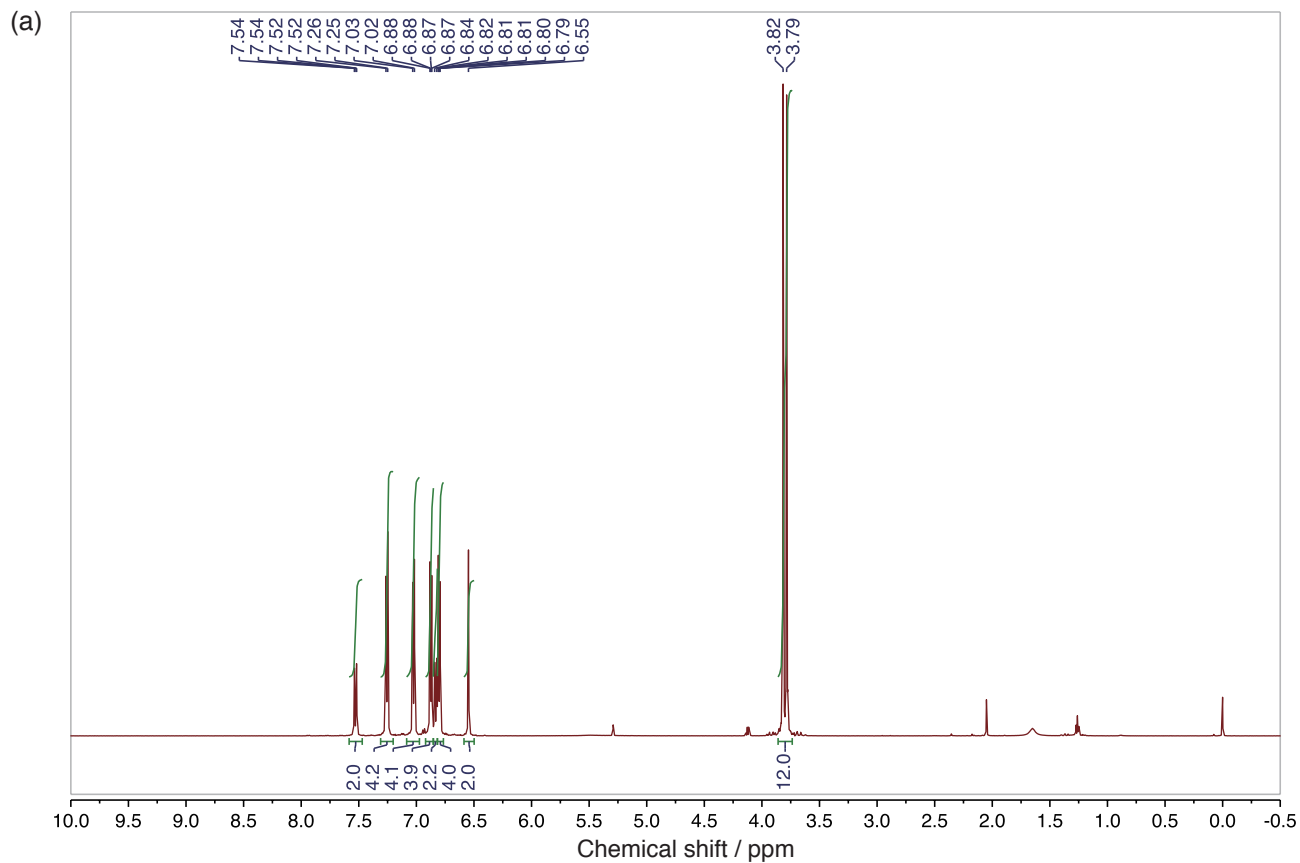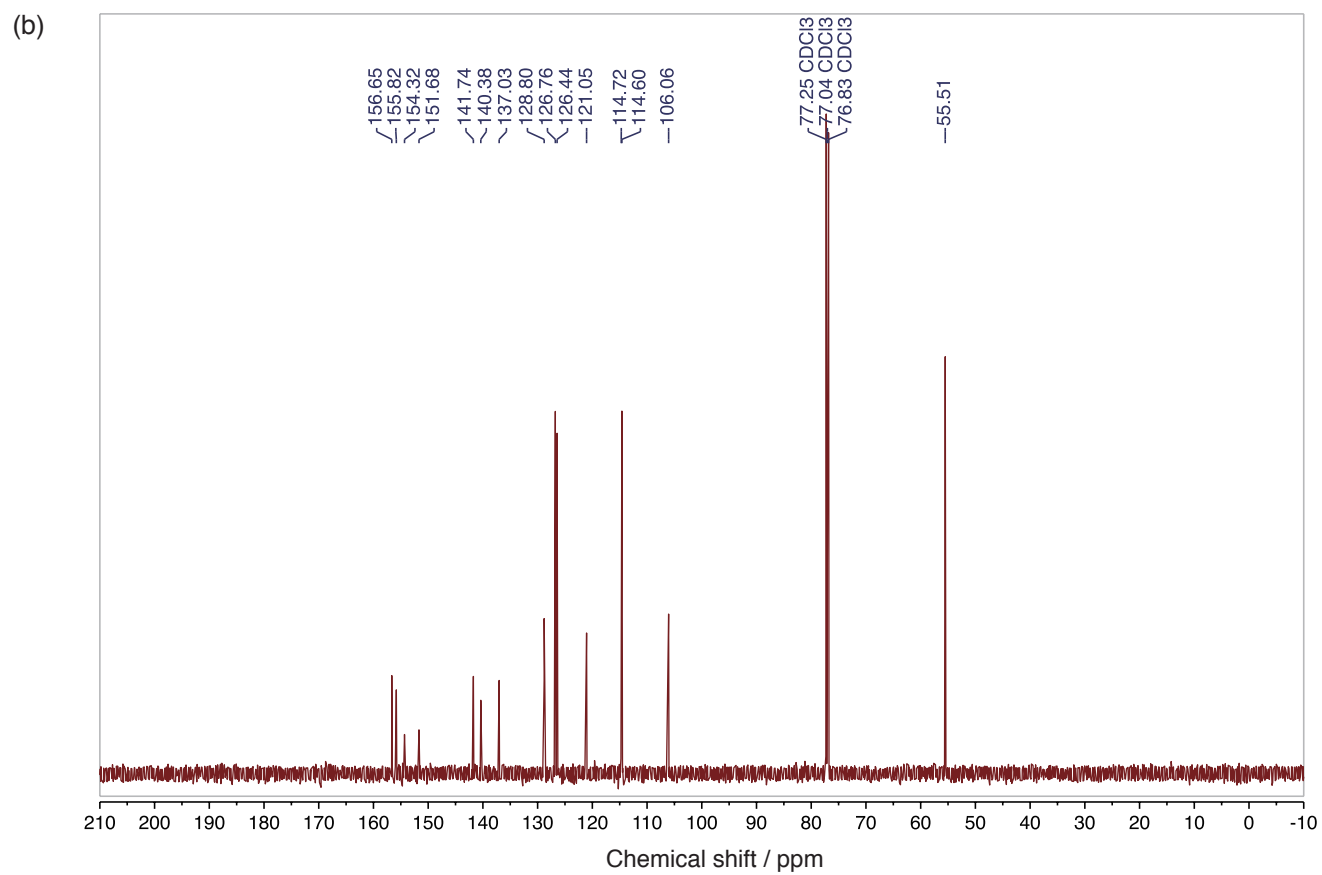

Figure S5. (a)  $^1\text{H}$  and (b)  $^{13}\text{C}$  NMR spectra of **2b**.

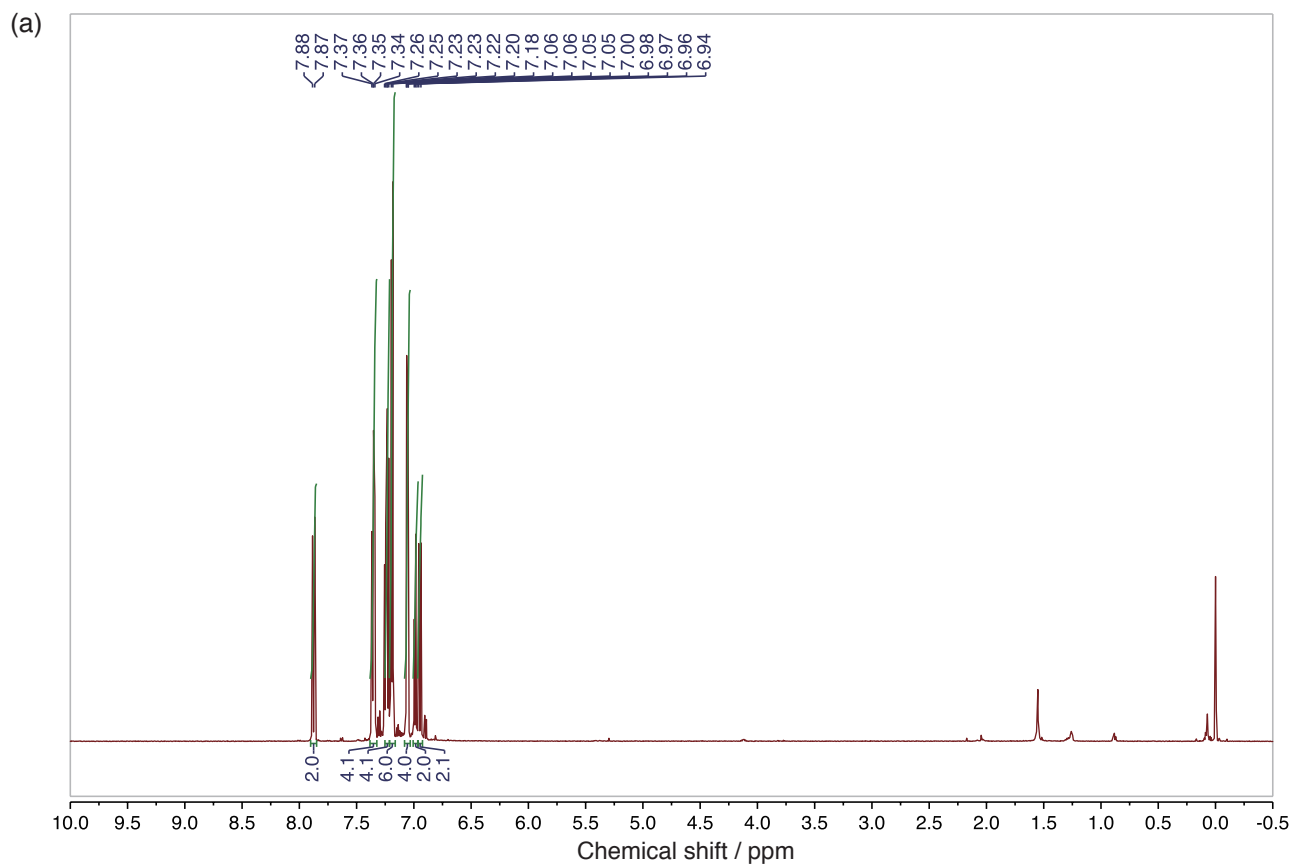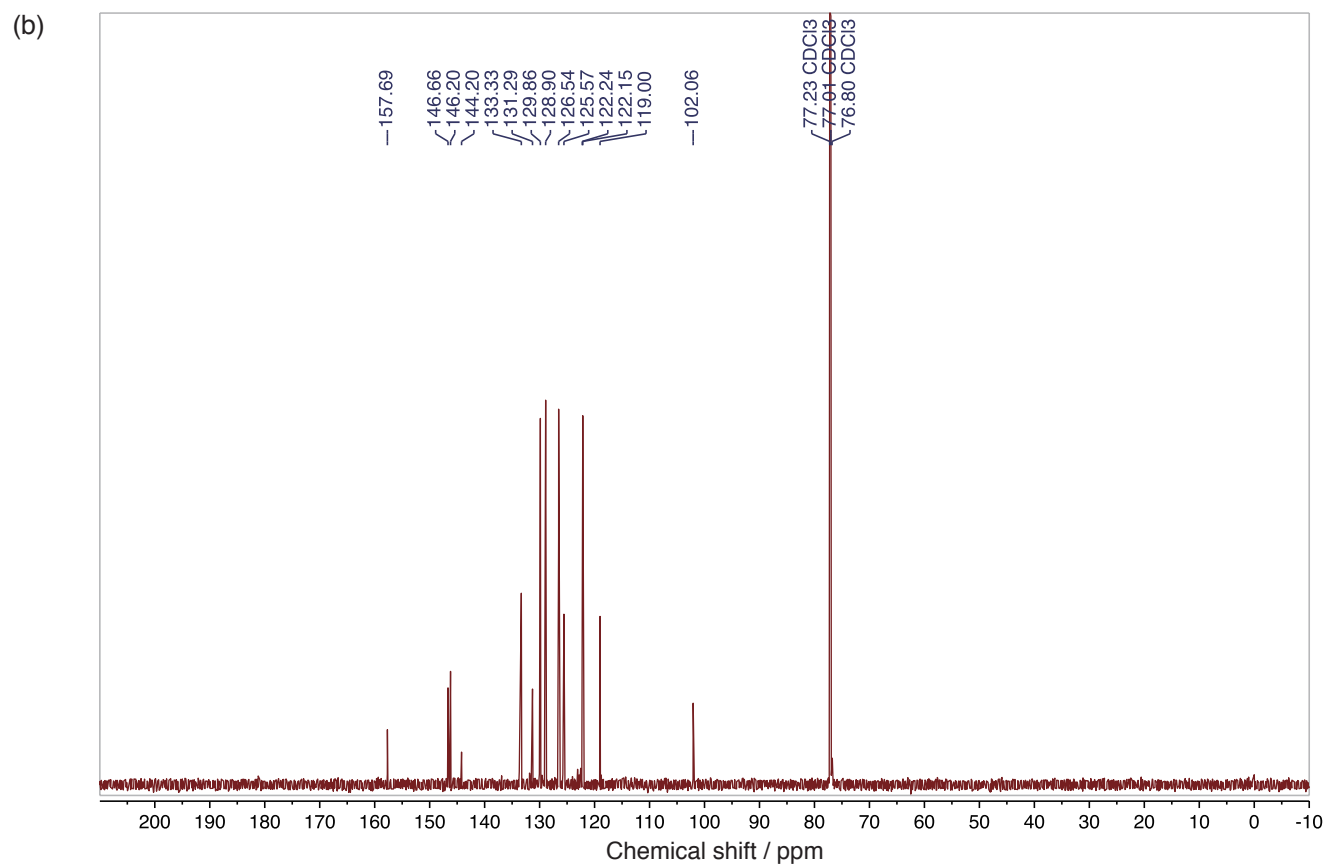

Figure S6. (a)  $^1\text{H}$  and (b)  $^{13}\text{C}$  NMR spectra of **2a-Br<sub>2</sub>**.

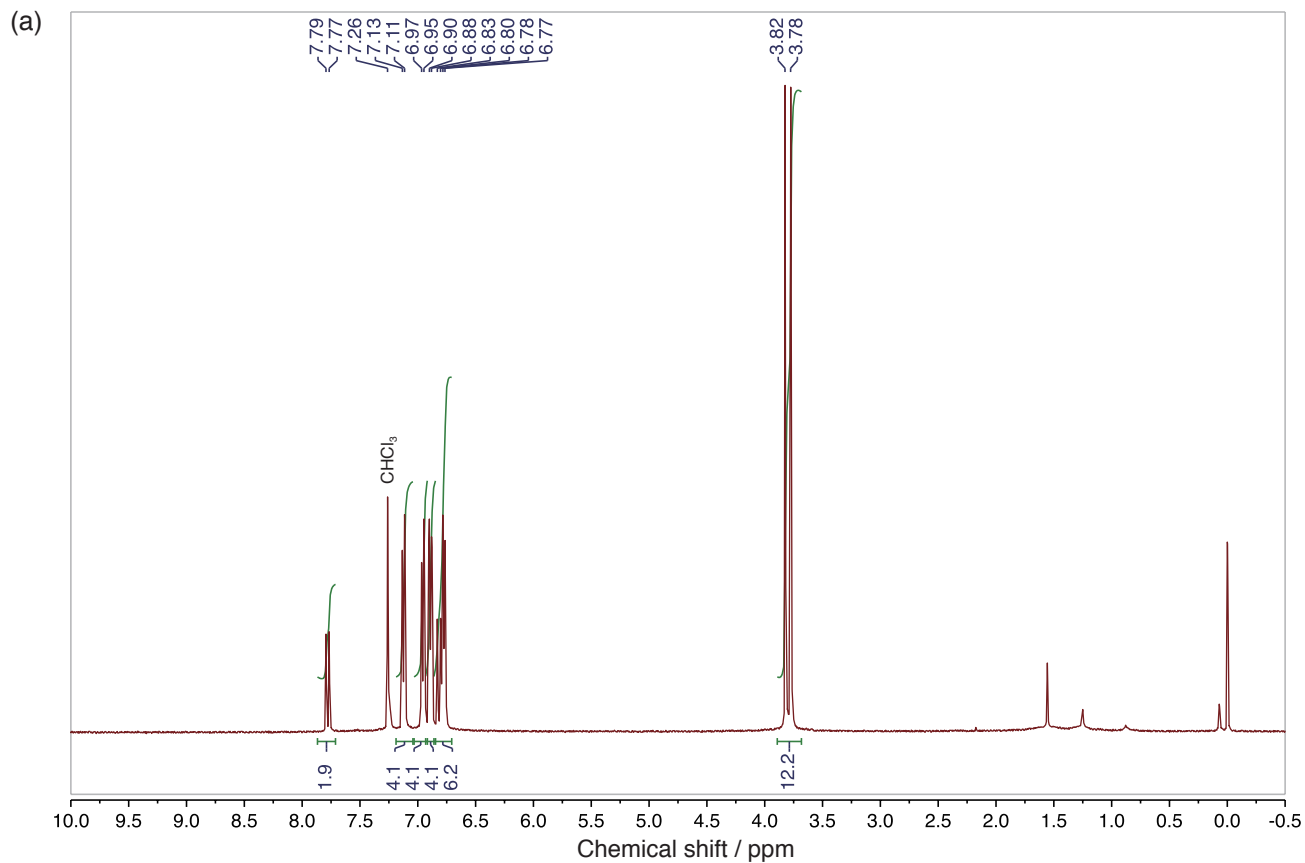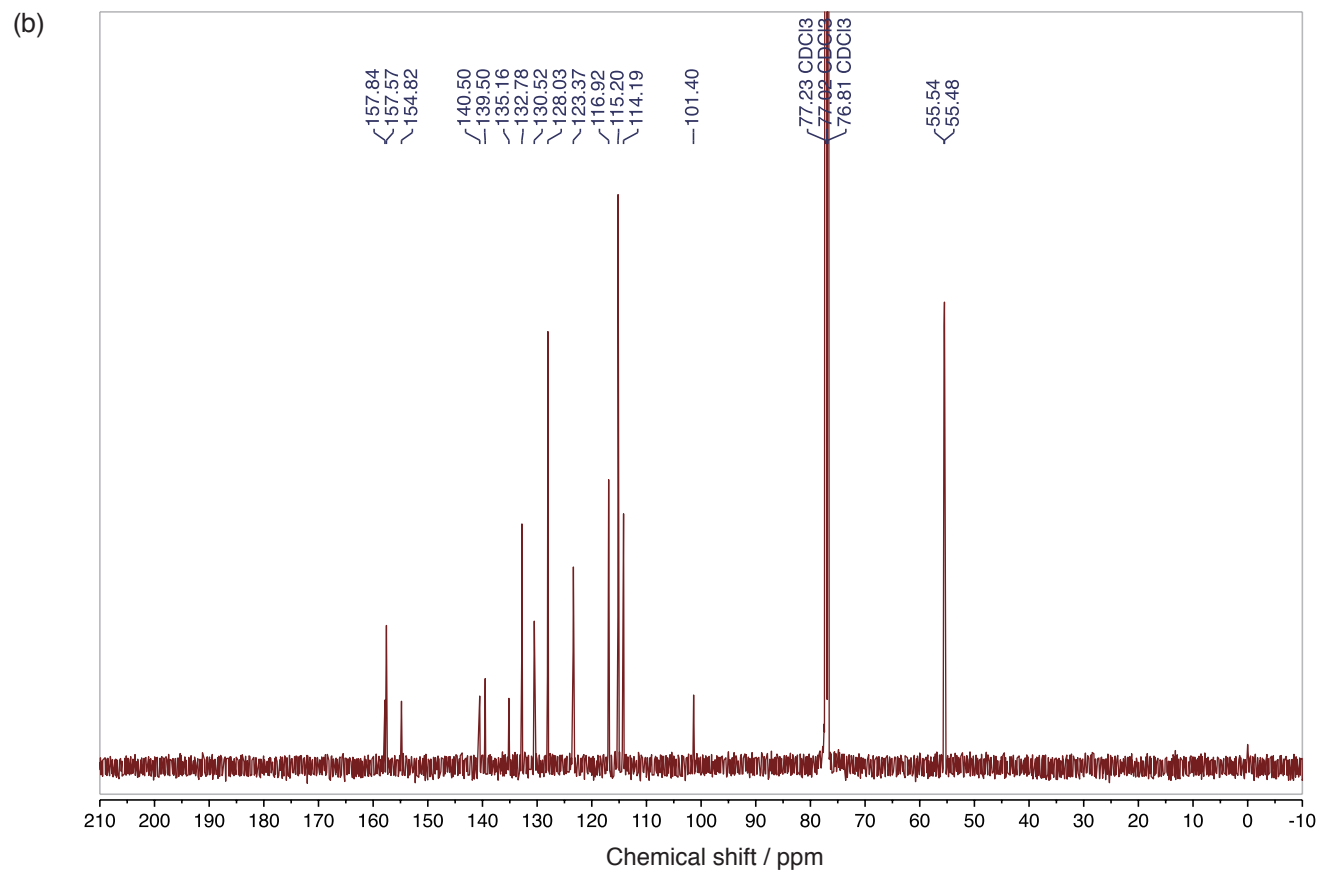

Figure S7. (a) <sup>1</sup>H and (b) <sup>13</sup>C NMR spectra of **2b-Br<sub>2</sub>**.

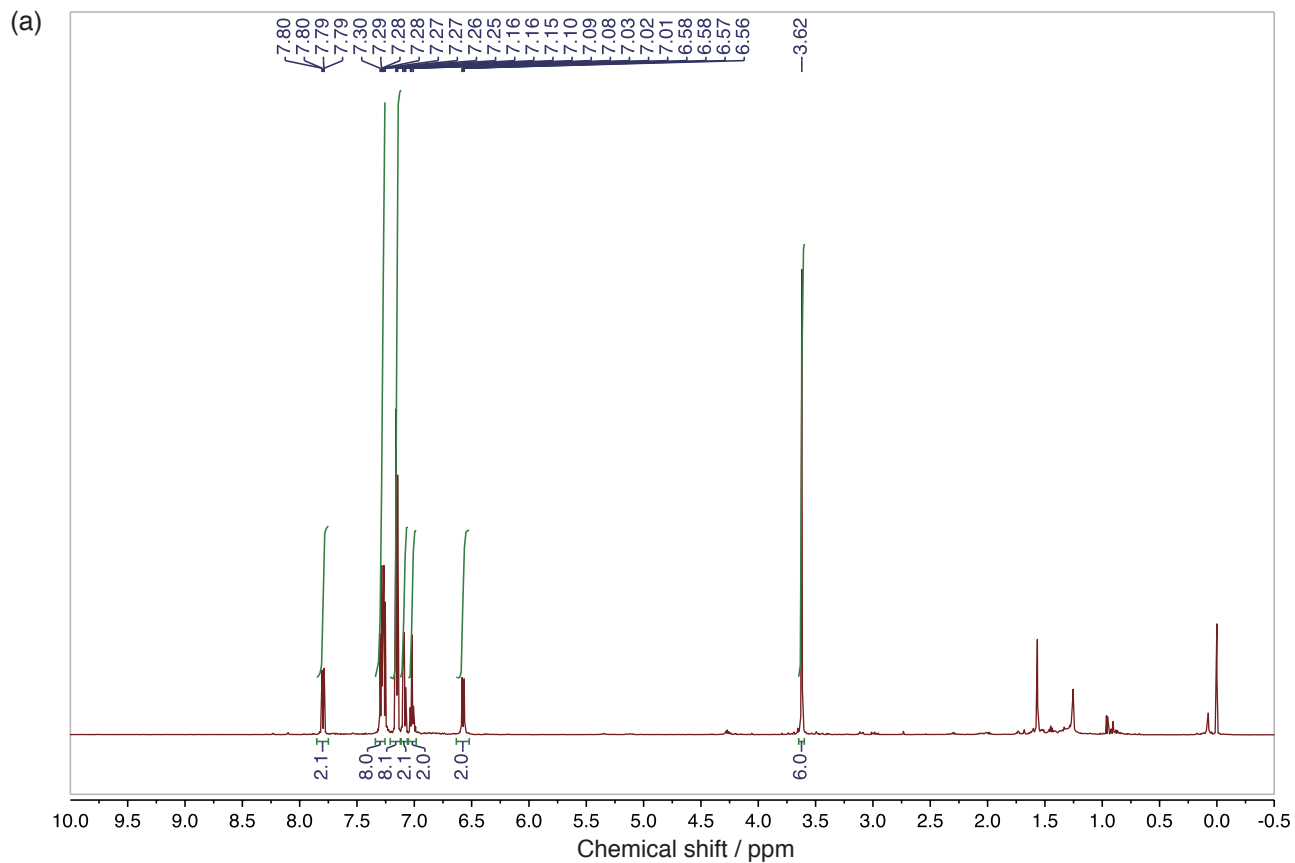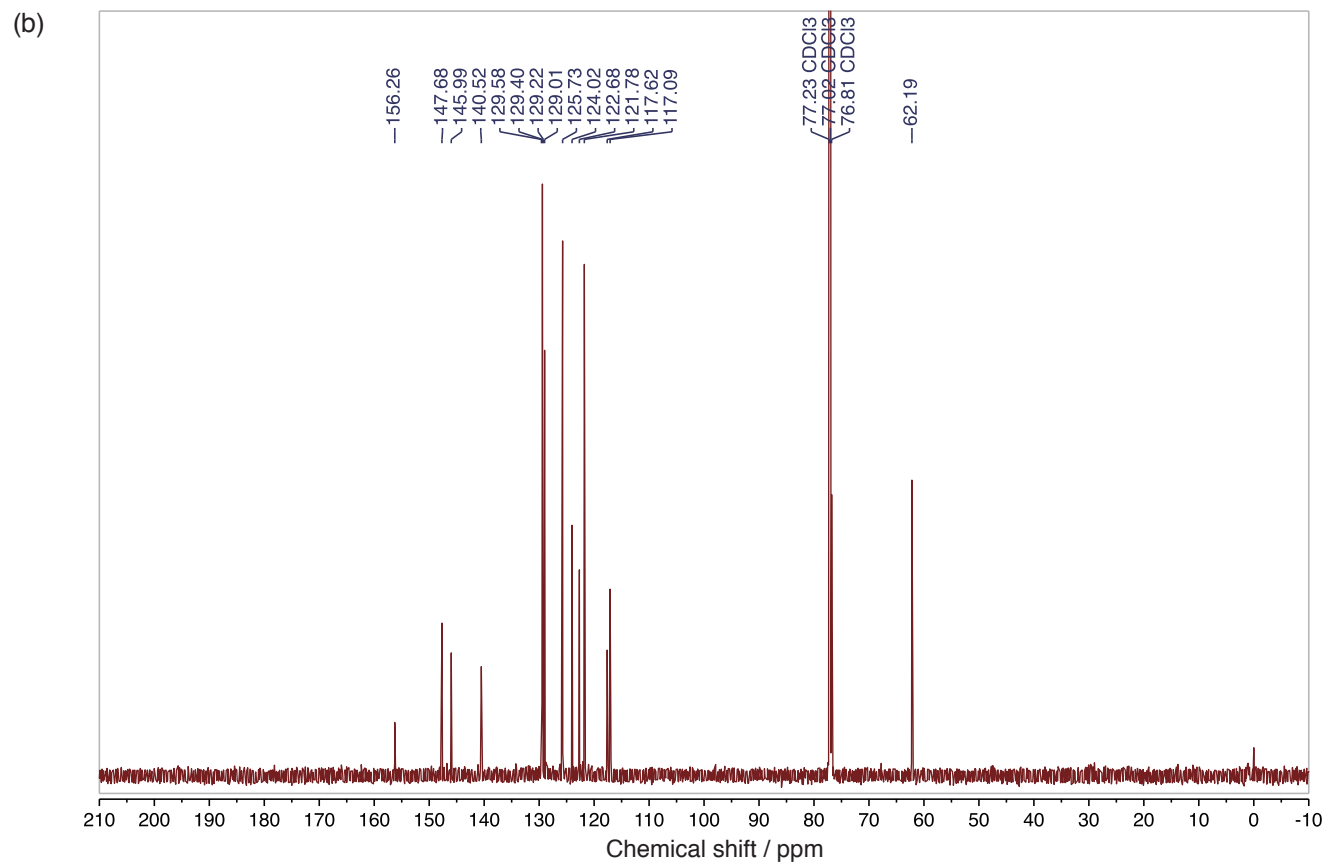

Figure S8. (a)  $^1\text{H}$  and (b)  $^{13}\text{C}$  NMR spectra of **3a**.

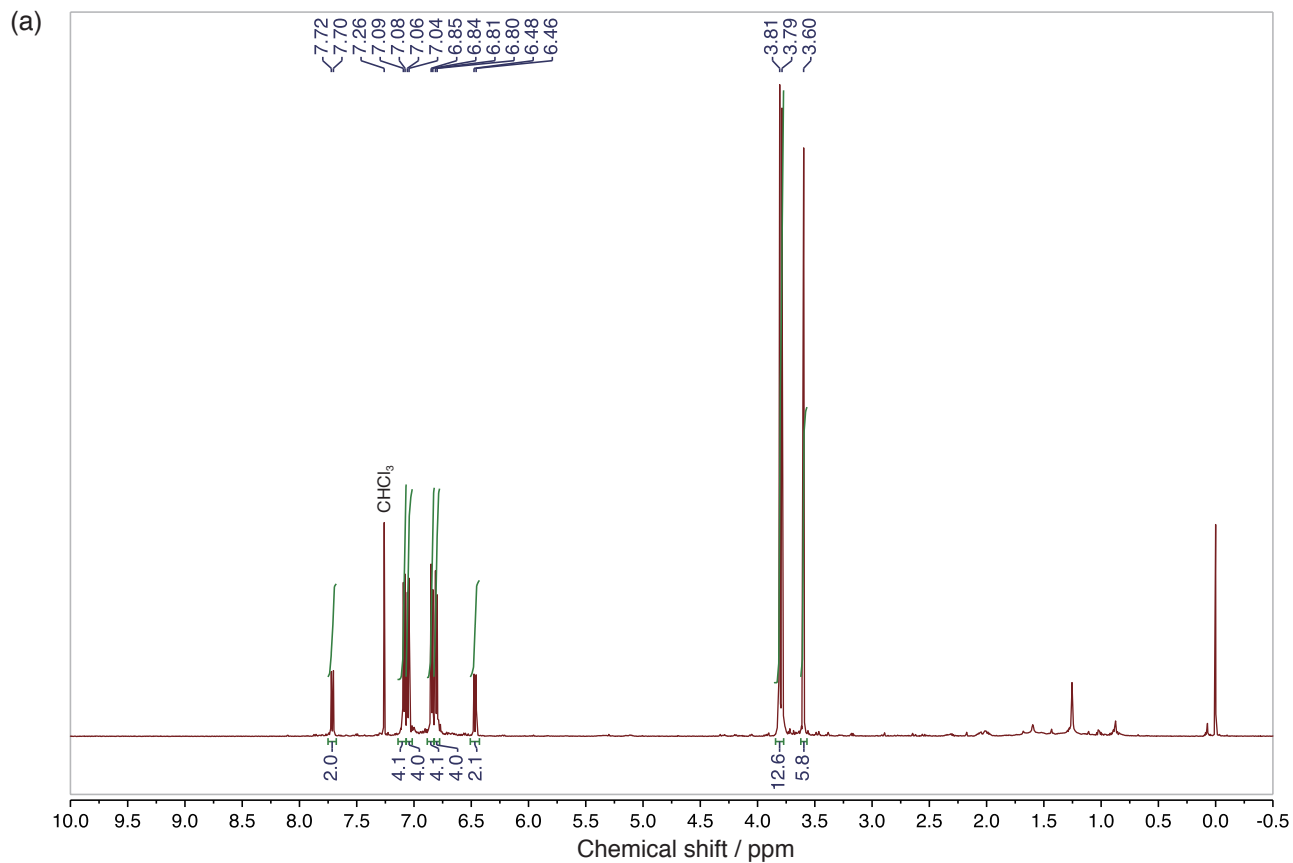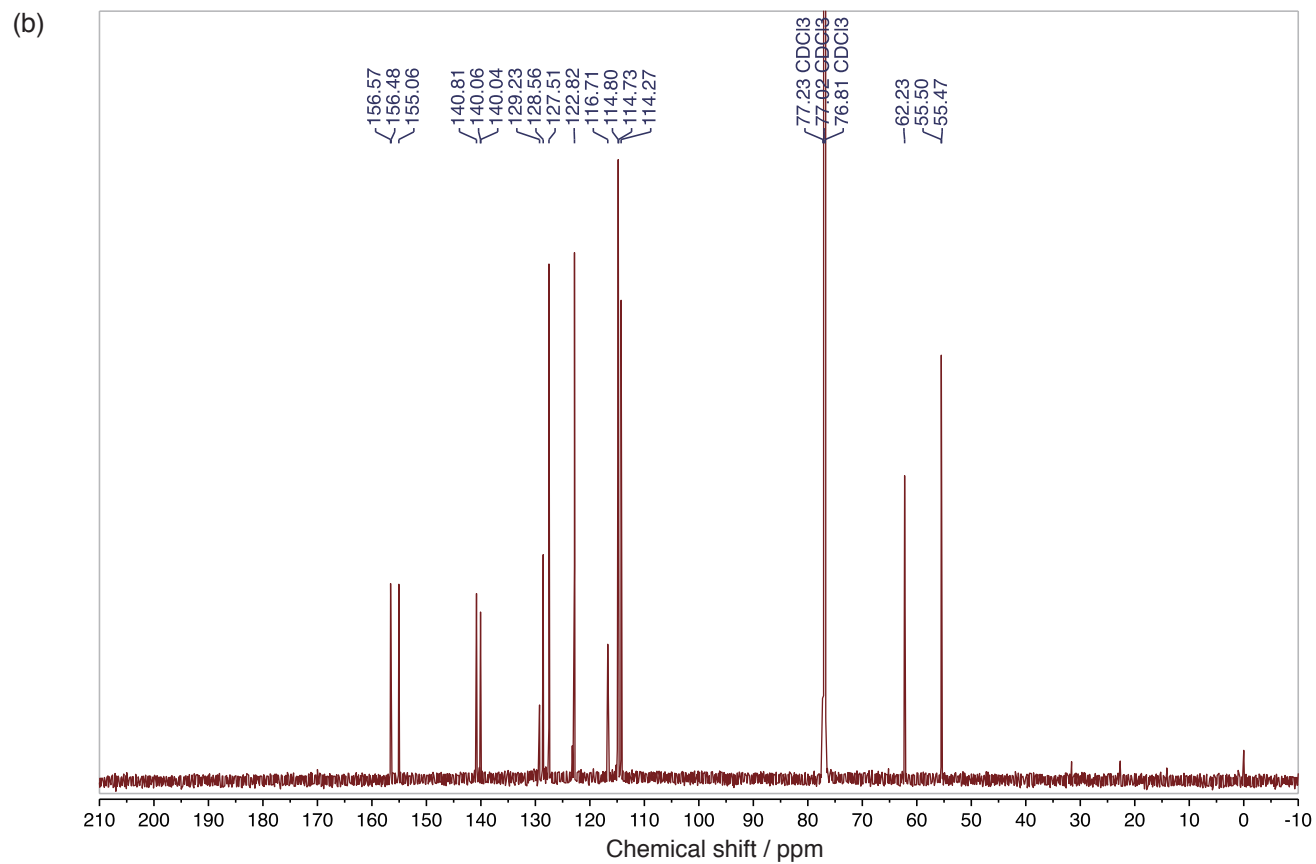

Figure S9. (a)  $^1\text{H}$  and (b)  $^{13}\text{C}$  NMR spectra of **3b**.

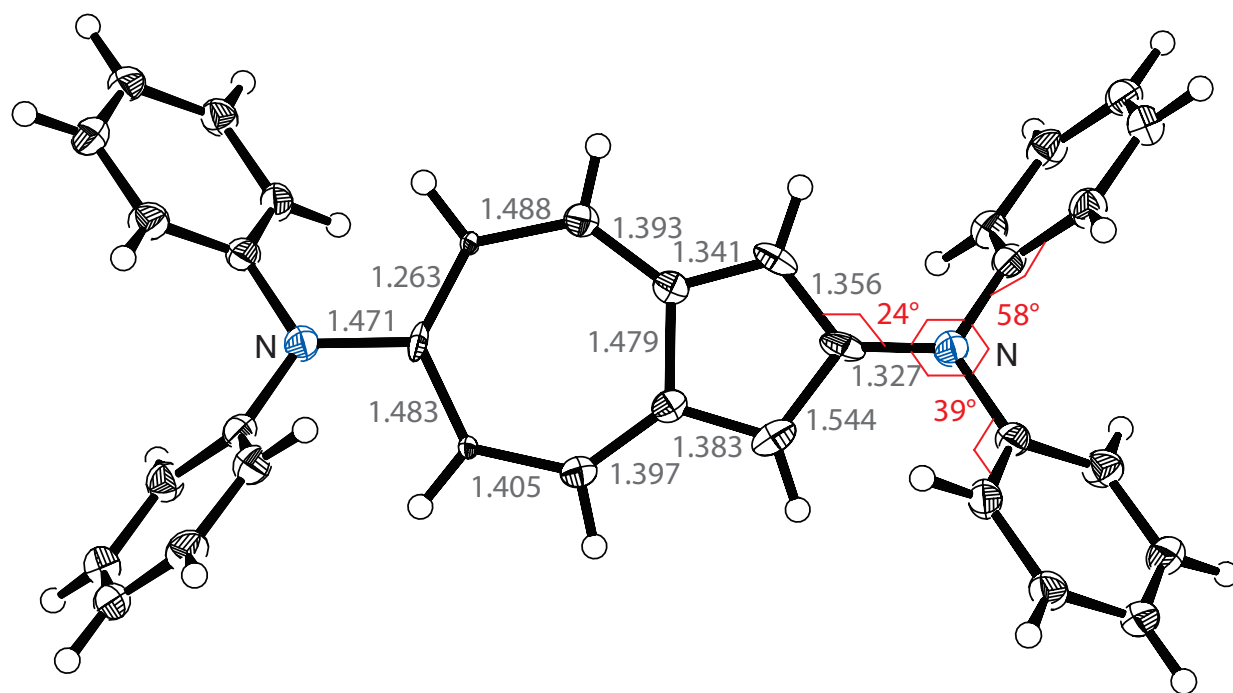

dihedral angle (°)  
bond length (Å)

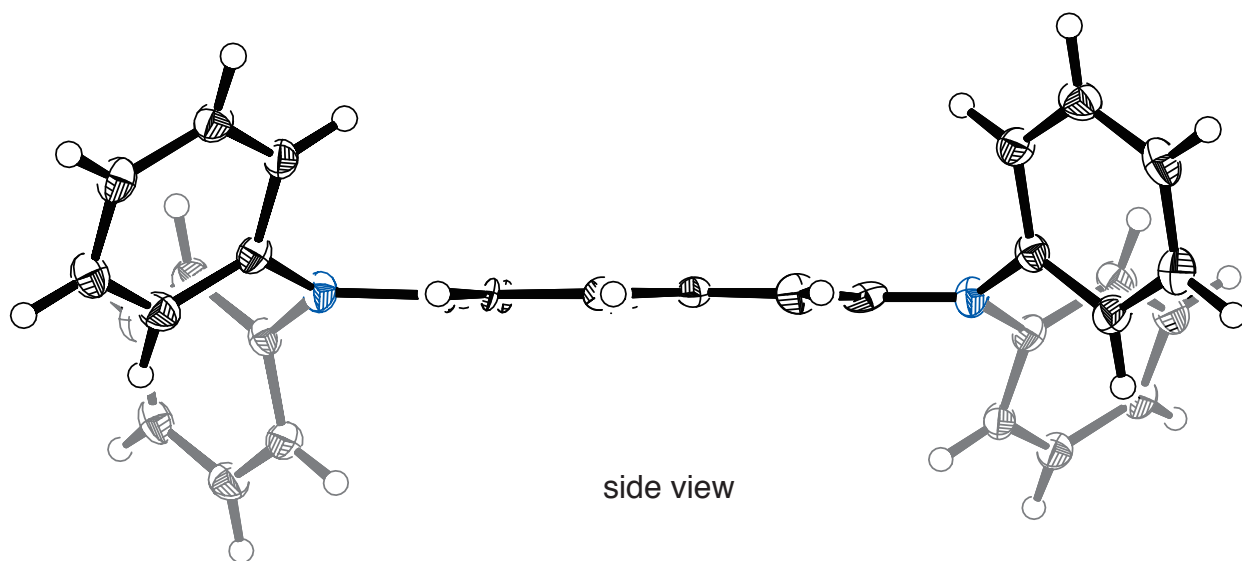

side view

Figure S10. ORTEP drawings of 2a.

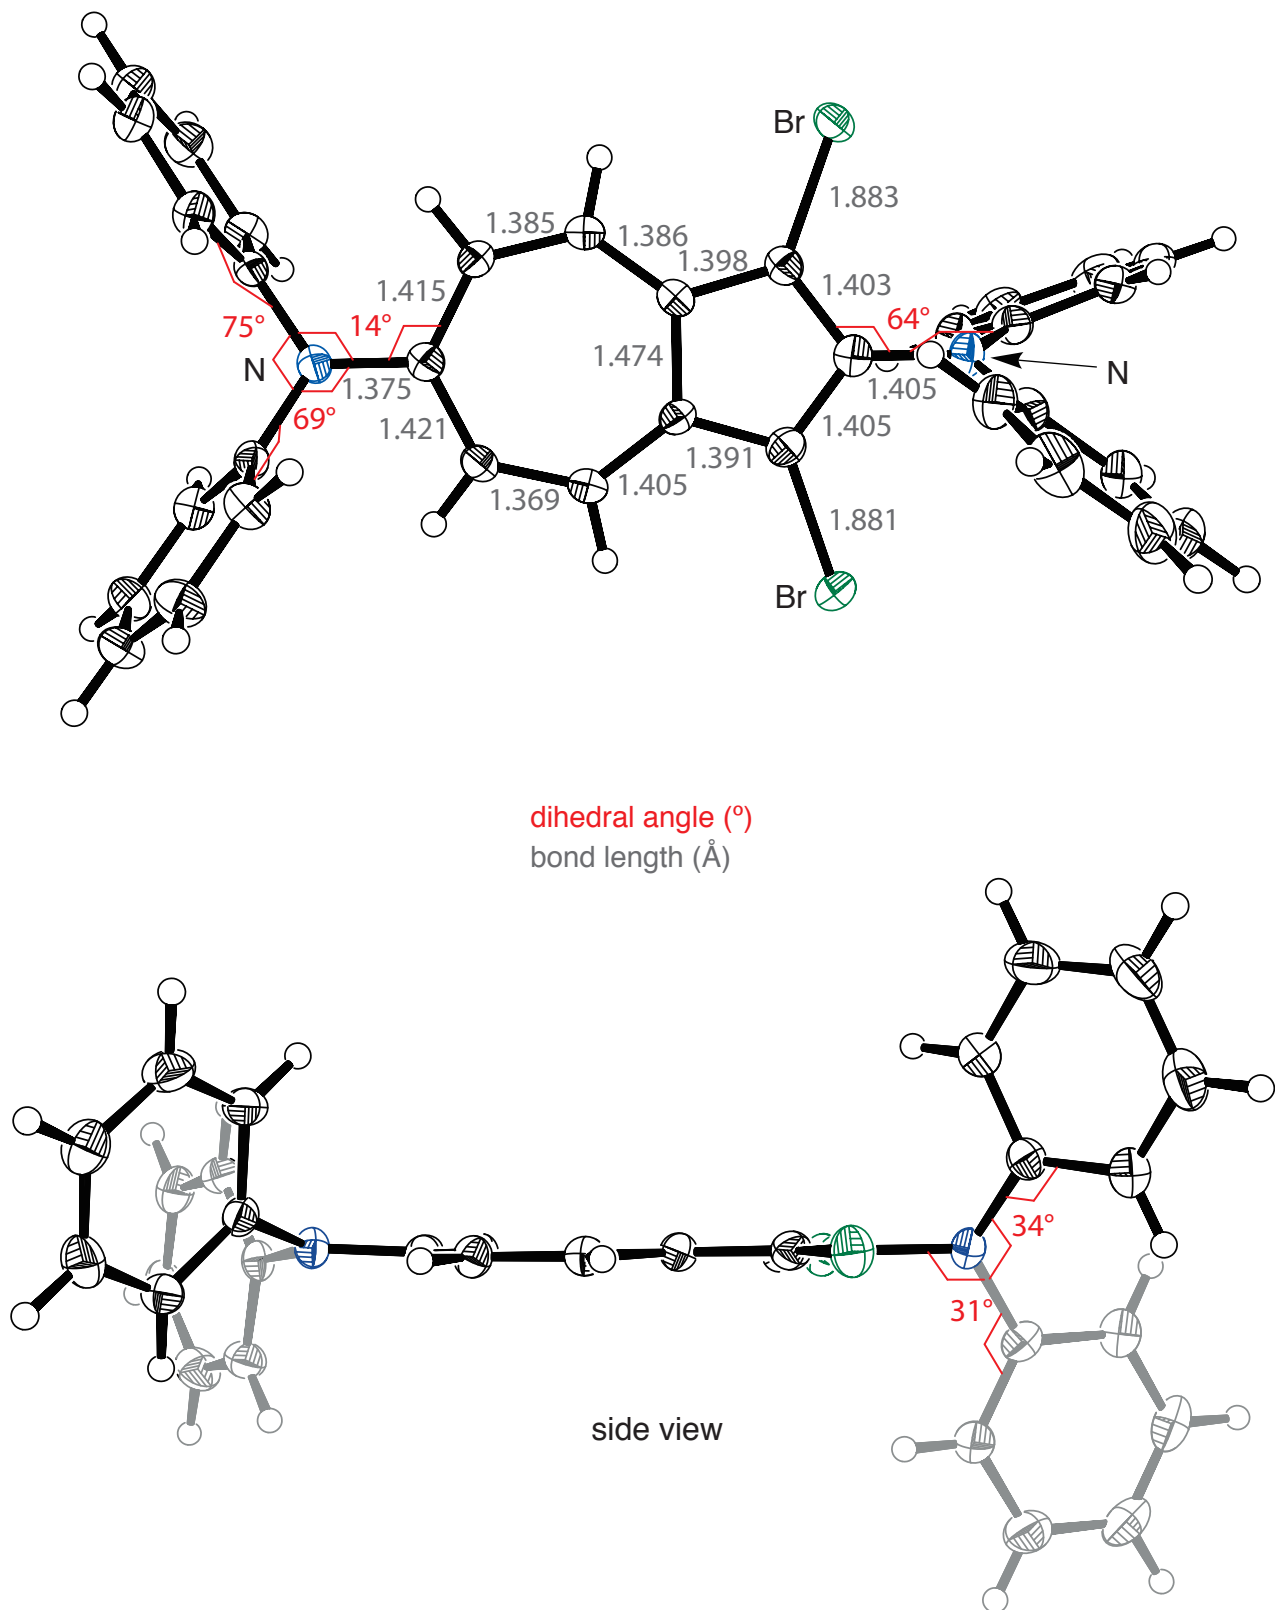

Figure S11. ORTEP drawings of **2a-Br<sub>2</sub>**.

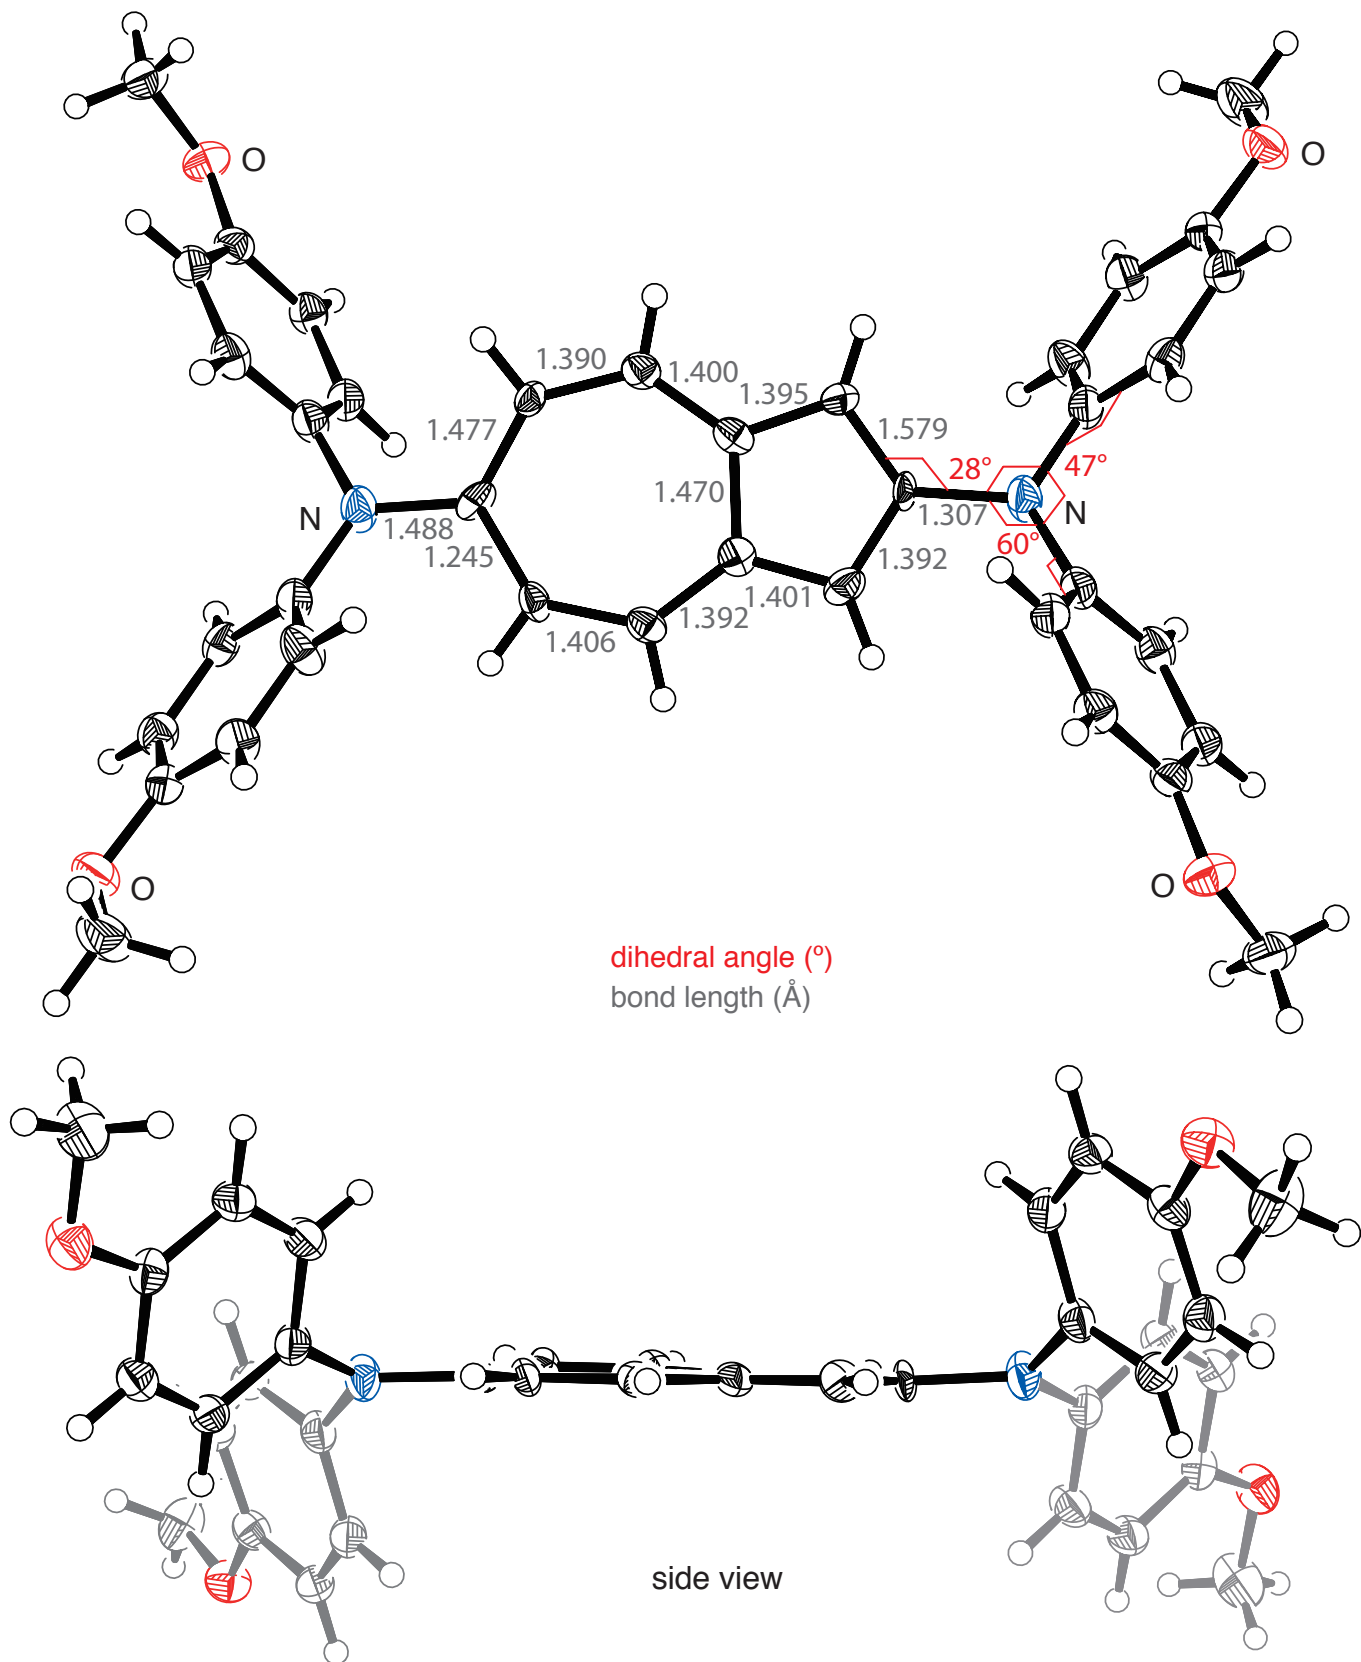

Figure S12. ORTEP drawings of 2b.



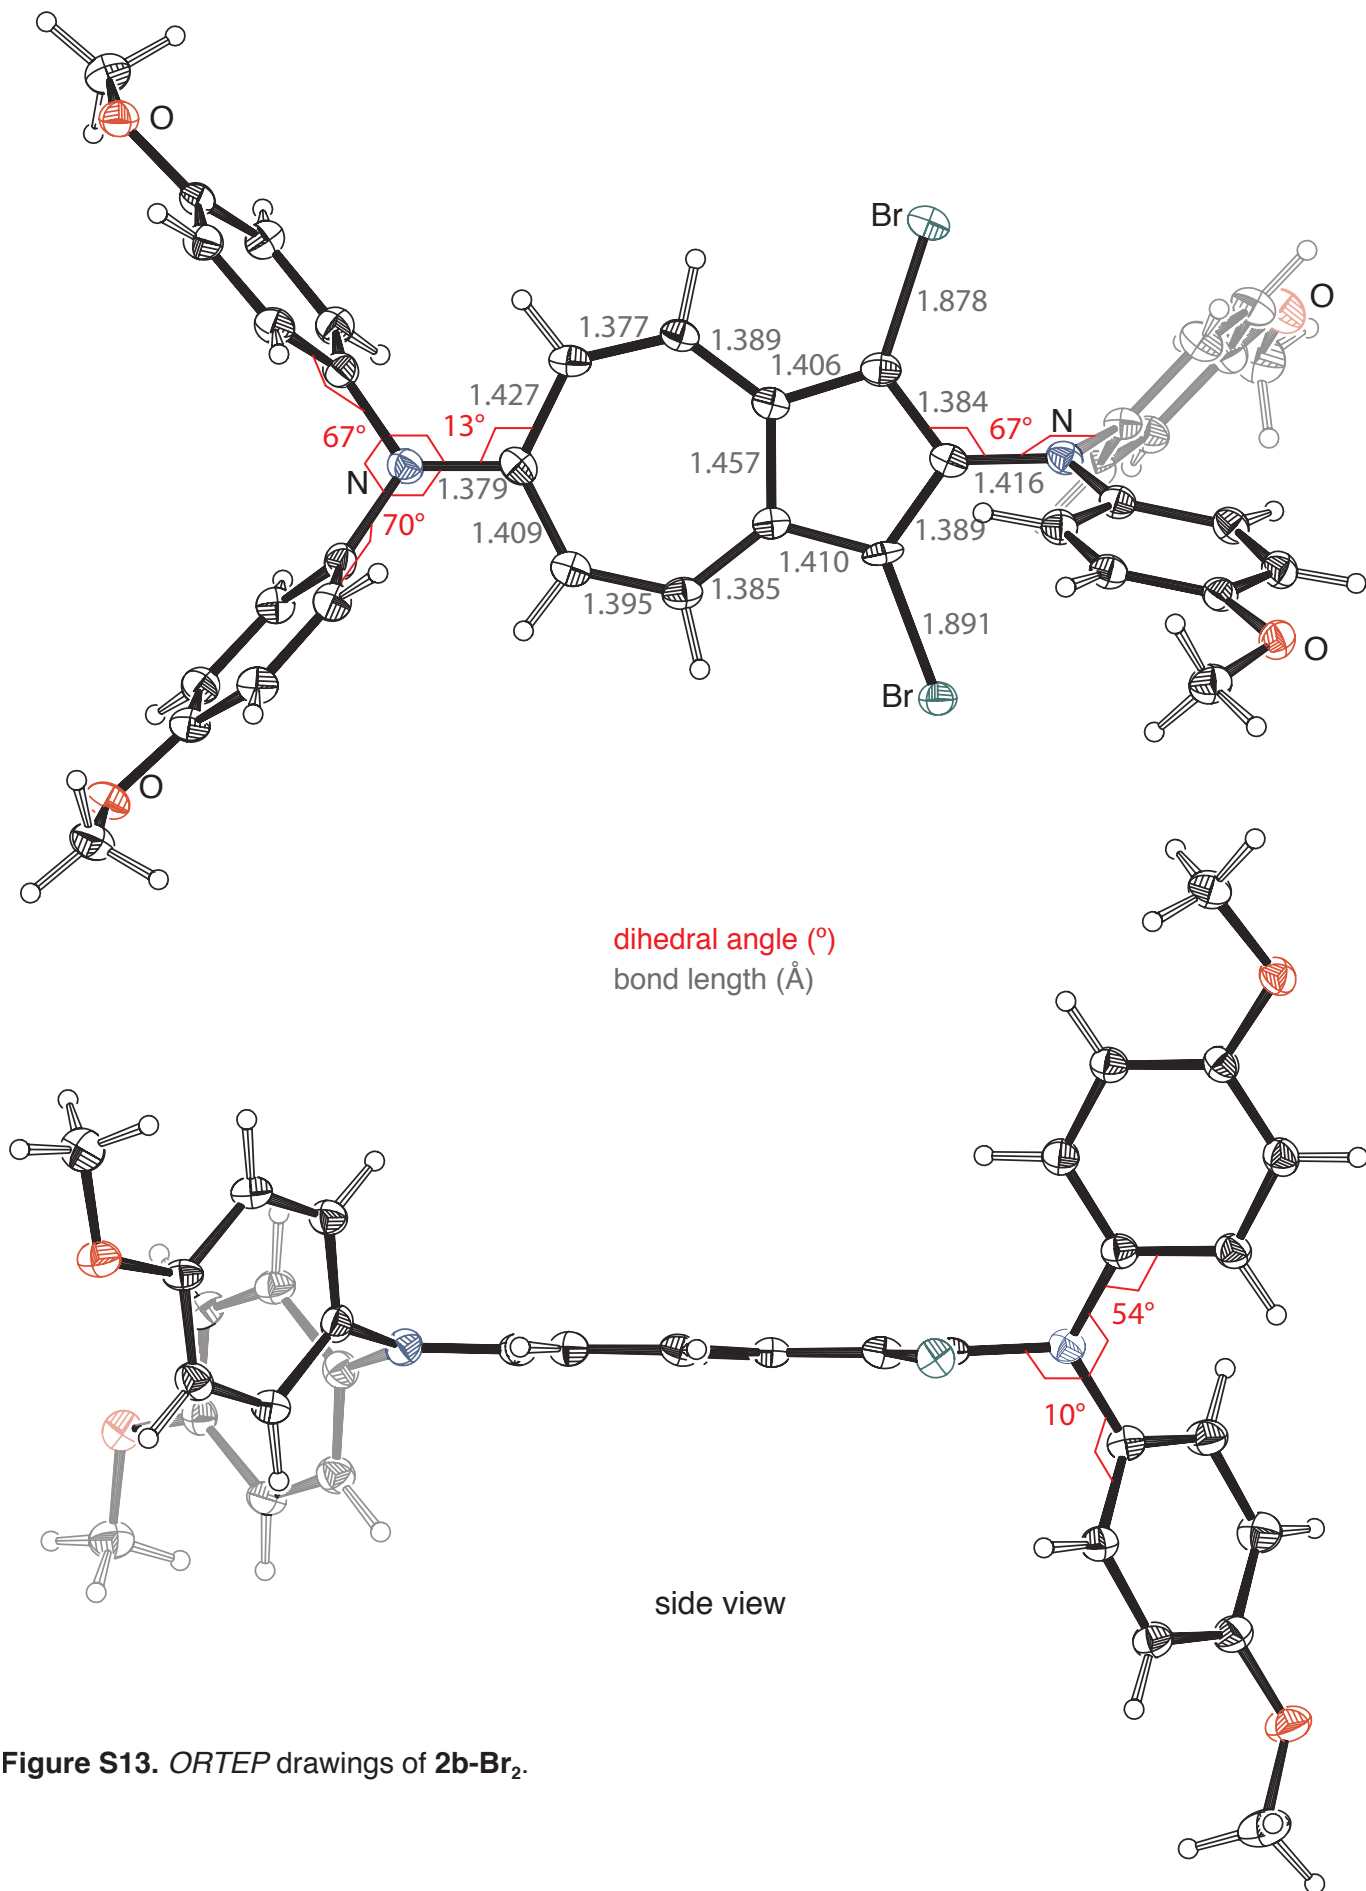

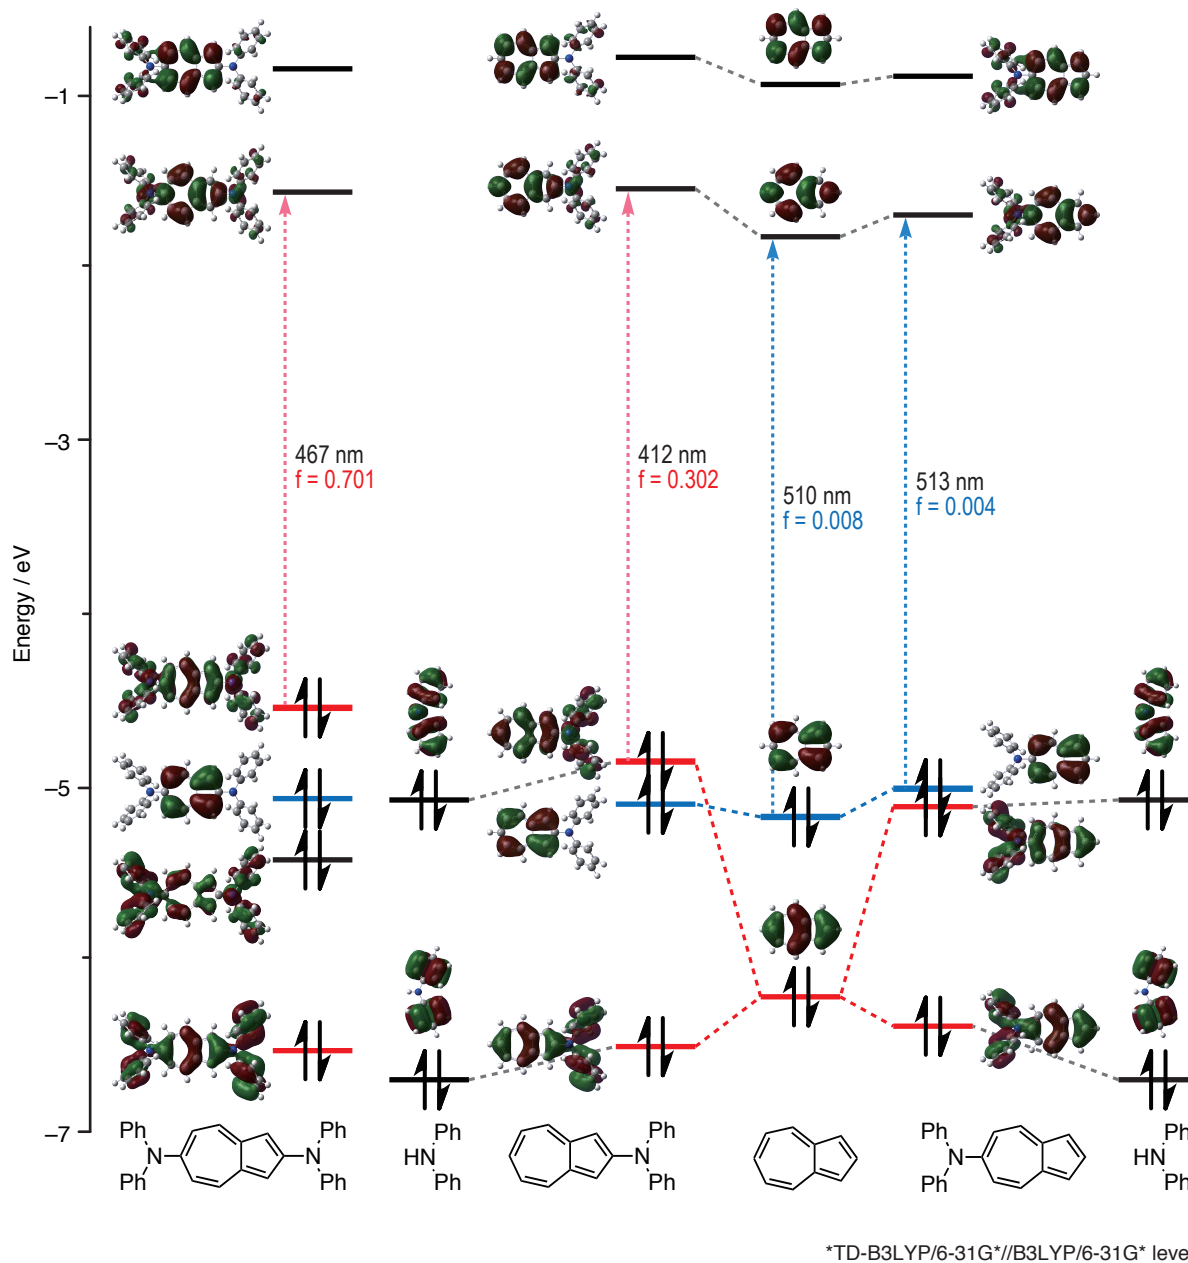

The introduction of a diphenylamino group to the 6-position of azulene exhibits weaker interaction between the LUMO of azulene and the HOMO of diphenylamine, and the MO energy level inversion is not exhibited unlike **2** and 2-(diphenylamino)azulene.

**Figure S14.** MO diagrams of **2**, 2- and 6-(diphenylamino)azulene, azulene, and diphenylamine. The HOMO of azulene and its derived molecular orbitals are indicated as blue lines, and the HOMO–1 of azulene and its derived molecular orbitals are indicated as red lines.

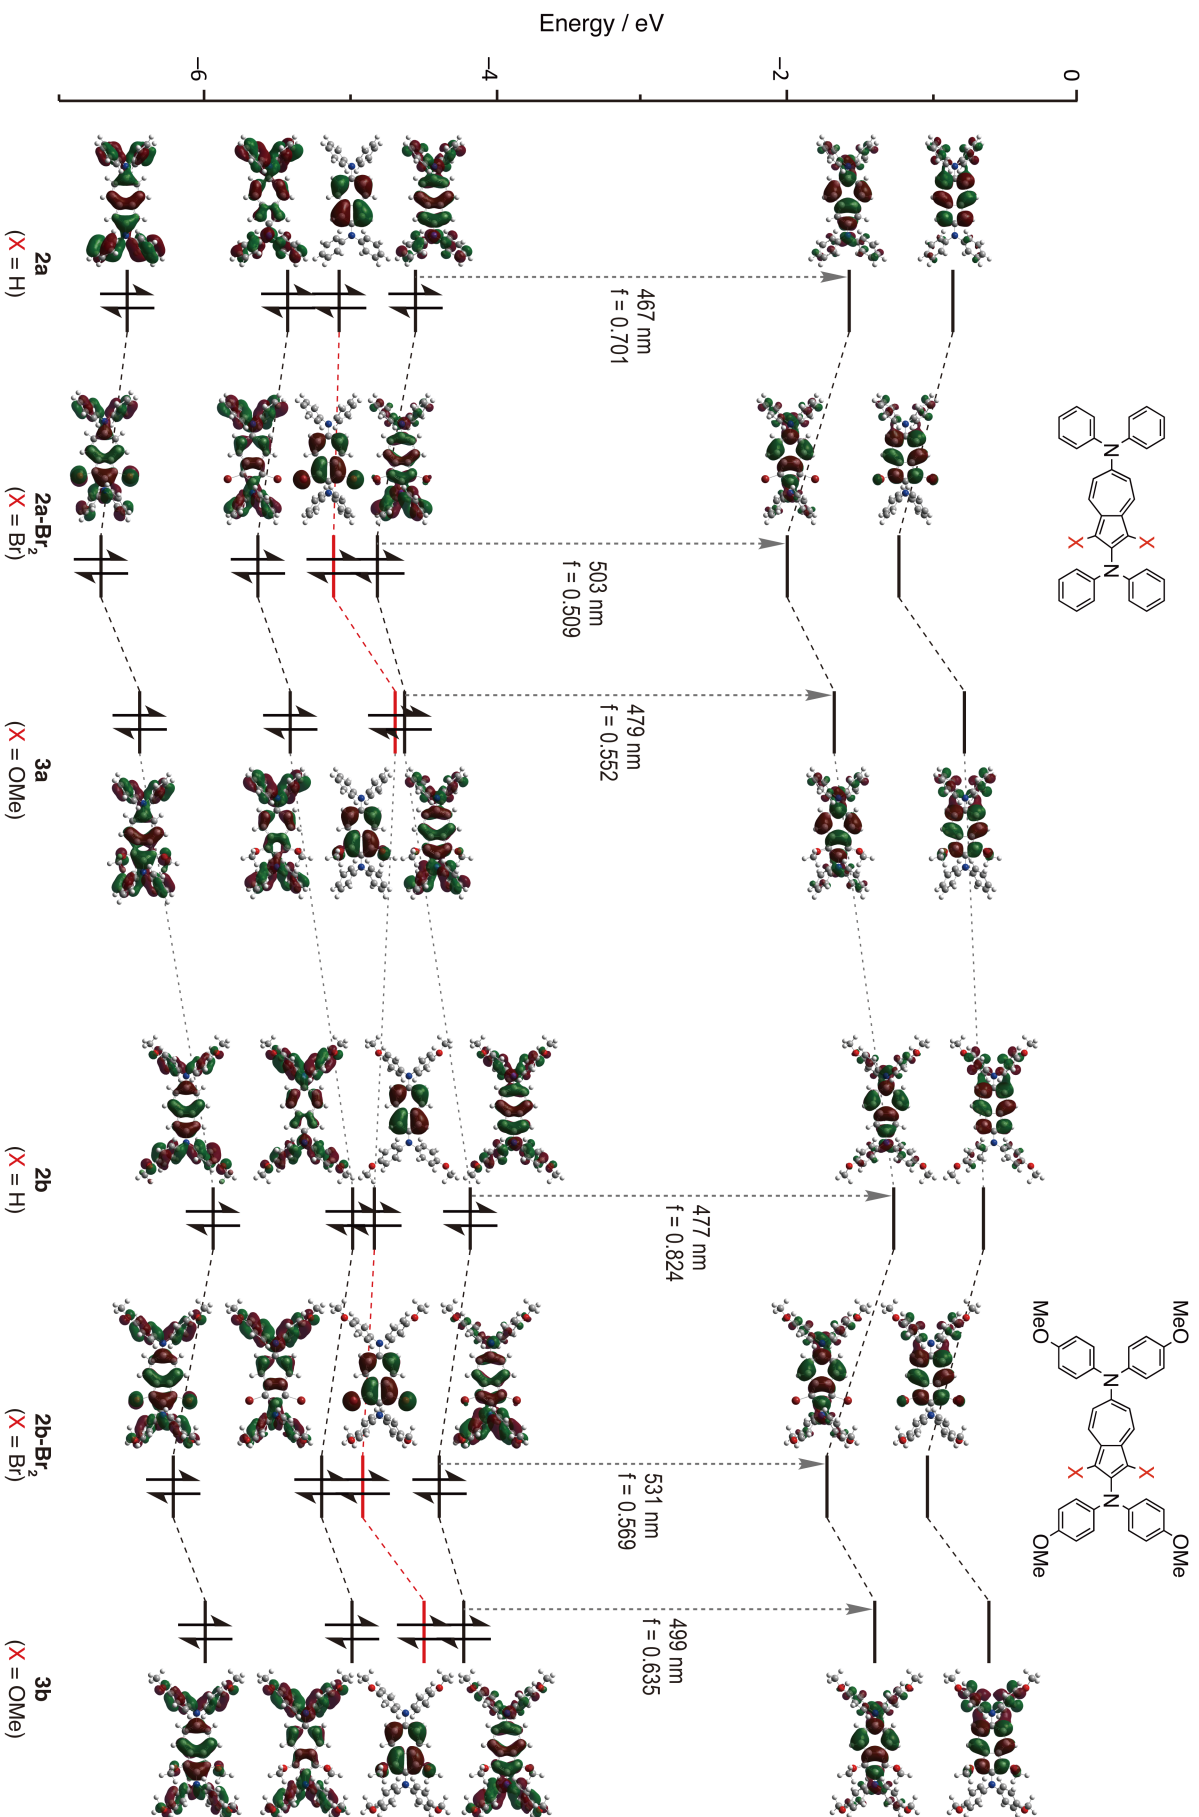

The doubly bromine-substituted **2-Br<sub>2</sub>** exhibits lower-lying energy levels than **2**, whereas the doubly methoxy-substituted **3** shows similar energy levels to **2**. The methoxy groups exhibit both an inductive electron-withdrawing effect and a mesomeric electron-donating effect, and tend to gently perturb each orbital of **2** individually. Exceptionally, the HOMO-1 of **2**, which has large coefficients at the 1- and 3-positions, is more strongly perturbed by the electron-donating effect and raised by the introduction of the bromines and especially methoxy groups at these positions.

**Figure S15.** MO diagrams of **2**, **2-Br<sub>2</sub>** and **3** disposed to compare the substituent effect at 1,3-positions of azulene skeleton.

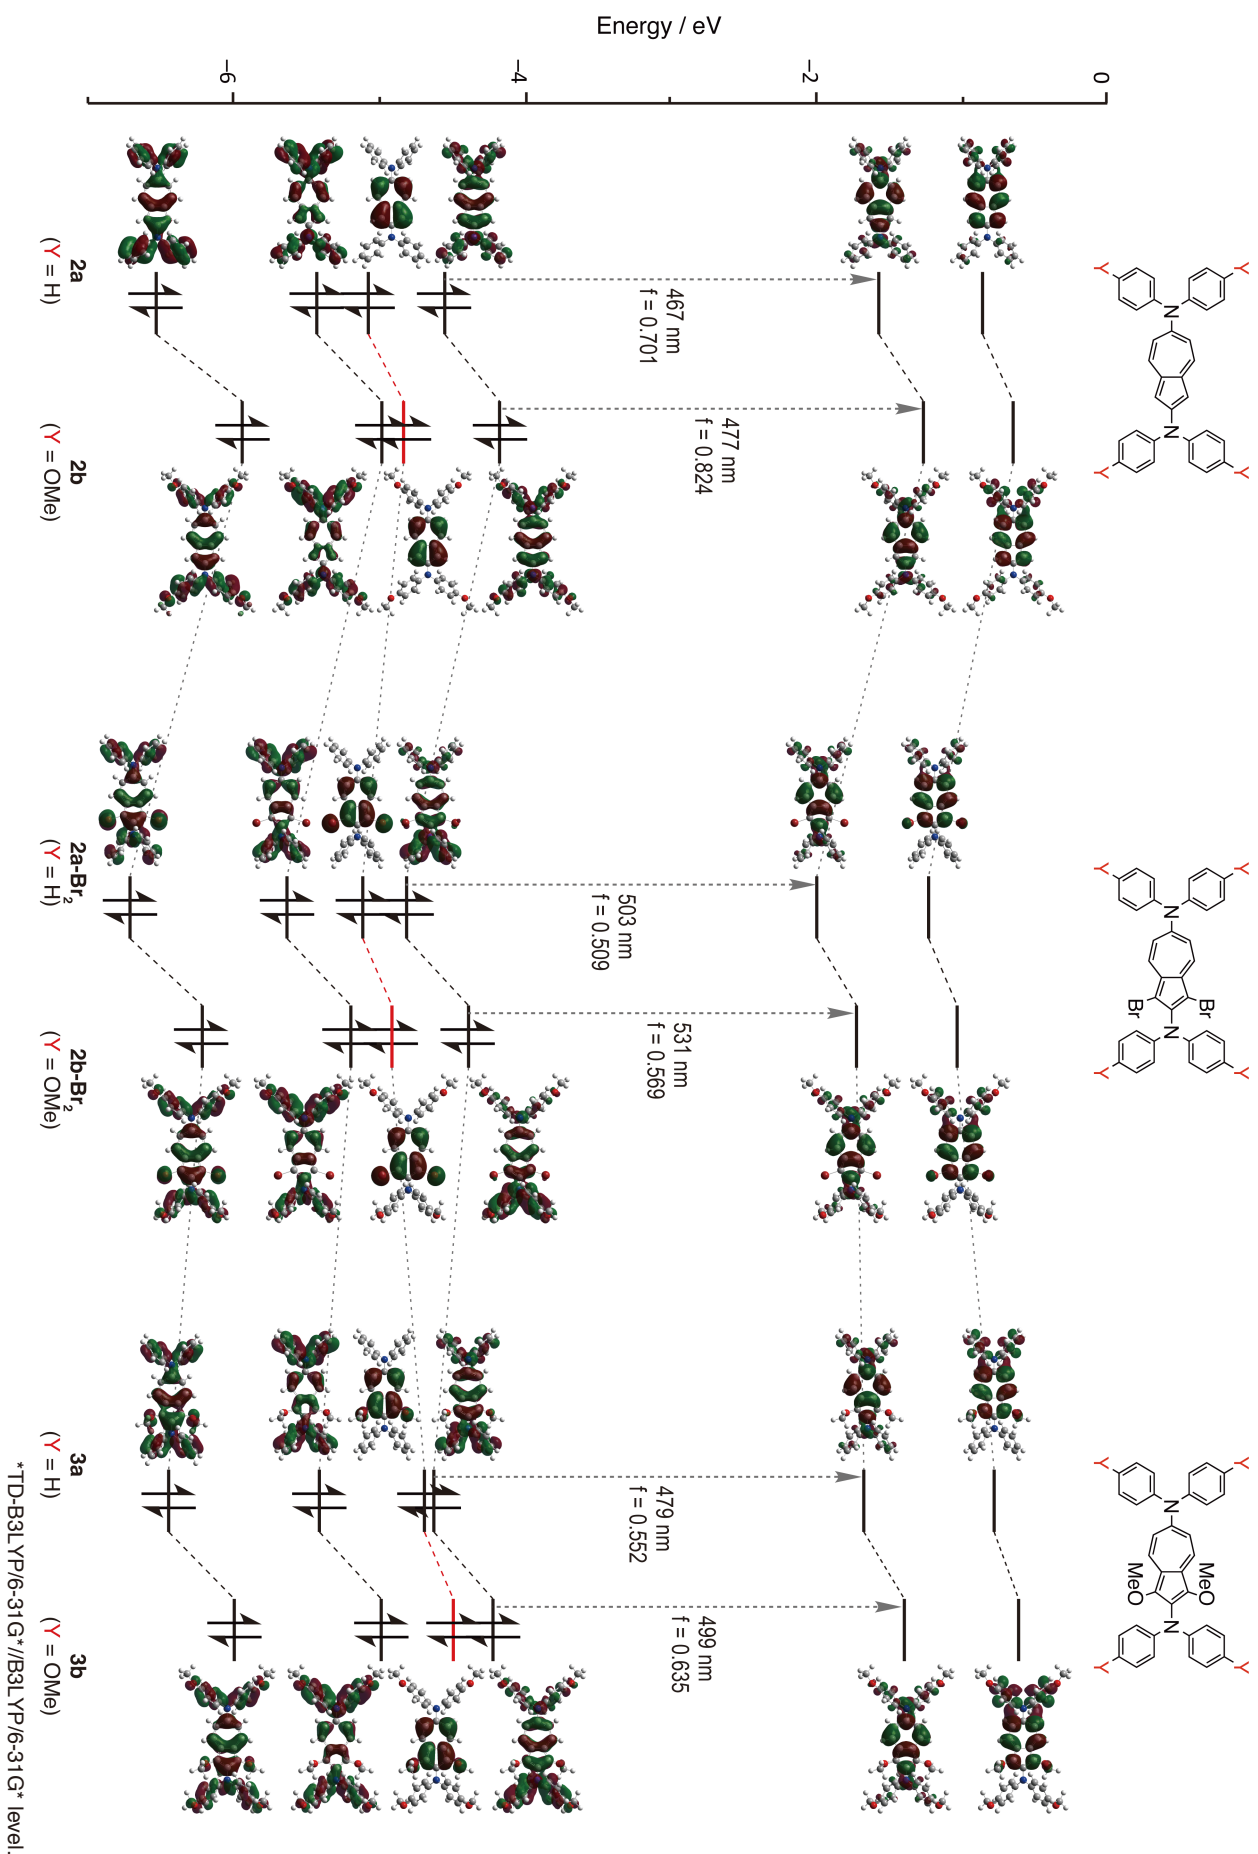

Although introduction of methoxy groups to the *para*-positions of the diphenylamino groups leads to an overall energy increase in the MO levels, HOMO-1 is not significantly affected. Its orbital node is located at 2- and 6-positions of the azulene skeleton. Therefore, it is considered to be less sensitive to substituent effects at these positions.

**Figure S16.** MO diagrams of **2**, **2-Br<sub>2</sub>** and **3** disposed to compare the substituent effect at *para*-positions of diphenylamino groups.

**Table S1.** Atomic coordinates of optimized structure of 1.

| Center Number | Atomic Number | Atomic Type | Coordinates (Angstroms) |           |           |
|---------------|---------------|-------------|-------------------------|-----------|-----------|
|               |               |             | X                       | Y         | Z         |
| 1             | 6             | 0           | -0.018456               | 0.746688  | 1.578692  |
| 2             | 6             | 0           | 0.018456                | -0.746688 | 1.578692  |
| 3             | 6             | 0           | 0.000000                | -1.150421 | 0.220593  |
| 4             | 6             | 0           | 0.000000                | 0.000000  | -0.587986 |
| 5             | 6             | 0           | 0.000000                | 1.150421  | 0.220593  |
| 6             | 6             | 0           | -0.081606               | 1.590809  | 2.680922  |
| 7             | 6             | 0           | -0.089241               | 1.262835  | 4.041273  |
| 8             | 6             | 0           | 0.000000                | 0.000000  | 4.634110  |
| 9             | 6             | 0           | 0.089241                | -1.262835 | 4.041273  |
| 10            | 6             | 0           | 0.081606                | -1.590809 | 2.680922  |
| 11            | 7             | 0           | -0.014983               | 2.486829  | -0.251910 |
| 12            | 6             | 0           | -1.025798               | 2.862277  | -1.178565 |
| 13            | 6             | 0           | -0.732106               | 3.655833  | -2.300177 |
| 14            | 6             | 0           | -1.739023               | 4.000408  | -3.199969 |
| 15            | 6             | 0           | -3.047759               | 3.550614  | -3.013601 |
| 16            | 6             | 0           | -3.340245               | 2.752576  | -1.905641 |
| 17            | 6             | 0           | -2.344299               | 2.415105  | -0.991834 |
| 18            | 6             | 0           | 1.061575                | 3.358473  | 0.059753  |
| 19            | 6             | 0           | 2.358558                | 2.855174  | 0.252059  |
| 20            | 6             | 0           | 3.403936                | 3.711762  | 0.592559  |
| 21            | 6             | 0           | 3.185583                | 5.083181  | 0.734910  |
| 22            | 6             | 0           | 1.898007                | 5.588096  | 0.539048  |
| 23            | 6             | 0           | 0.842404                | 4.739330  | 0.213787  |
| 24            | 7             | 0           | 0.014983                | -2.486829 | -0.251910 |
| 25            | 6             | 0           | -1.061575               | -3.358473 | 0.059753  |
| 26            | 6             | 0           | -2.358558               | -2.855174 | 0.252059  |
| 27            | 6             | 0           | -3.403936               | -3.711762 | 0.592559  |
| 28            | 6             | 0           | -3.185583               | -5.083181 | 0.734910  |
| 29            | 6             | 0           | -1.898007               | -5.588096 | 0.539048  |
| 30            | 6             | 0           | -0.842404               | -4.739330 | 0.213787  |
| 31            | 6             | 0           | 1.025798                | -2.862277 | -1.178565 |
| 32            | 6             | 0           | 2.344299                | -2.415105 | -0.991834 |
| 33            | 6             | 0           | 3.340245                | -2.752576 | -1.905641 |
| 34            | 6             | 0           | 3.047759                | -3.550614 | -3.013601 |
| 35            | 6             | 0           | 1.739023                | -4.000408 | -3.199969 |
| 36            | 6             | 0           | 0.732106                | -3.655833 | -2.300177 |
| 37            | 1             | 0           | 0.000000                | 0.000000  | -1.671727 |
| 38            | 1             | 0           | -0.127216               | 2.653166  | 2.449365  |
| 39            | 1             | 0           | -0.159595               | 2.103985  | 4.726935  |
| 40            | 1             | 0           | 0.000000                | 0.000000  | 5.723243  |
| 41            | 1             | 0           | 0.159595                | -2.103985 | 4.726935  |
| 42            | 1             | 0           | 0.127216                | -2.653166 | 2.449365  |
| 43            | 1             | 0           | 0.284911                | 3.996529  | -2.464345 |
| 44            | 1             | 0           | -1.491508               | 4.613538  | -4.062849 |
| 45            | 1             | 0           | -3.827214               | 3.816779  | -3.721795 |
| 46            | 1             | 0           | -4.354425               | 2.397135  | -1.742015 |
| 47            | 1             | 0           | -2.579247               | 1.805735  | -0.124843 |
| 48            | 1             | 0           | 2.539360                | 1.791953  | 0.132646  |
| 49            | 1             | 0           | 4.400159                | 3.300956  | 0.735944  |
| 50            | 1             | 0           | 4.004300                | 5.747769  | 0.995433  |
| 51            | 1             | 0           | 1.706391                | 6.652056  | 0.653511  |
| 52            | 1             | 0           | -0.157166               | 5.139755  | 0.078408  |
| 53            | 1             | 0           | -2.539360               | -1.791953 | 0.132646  |
| 54            | 1             | 0           | -4.400159               | -3.300956 | 0.735944  |
| 55            | 1             | 0           | -4.004300               | -5.747769 | 0.995433  |
| 56            | 1             | 0           | -1.706391               | -6.652056 | 0.653511  |
| 57            | 1             | 0           | 0.157166                | -5.139755 | 0.078408  |
| 58            | 1             | 0           | 2.579247                | -1.805735 | -0.124843 |
| 59            | 1             | 0           | 4.354425                | -2.397135 | -1.742015 |
| 60            | 1             | 0           | 3.827214                | -3.816779 | -3.721795 |
| 61            | 1             | 0           | 1.491508                | -4.613538 | -4.062849 |
| 62            | 1             | 0           | -0.284911               | -3.996529 | -2.464345 |

Method: B3LYP/6-31G(d)

Key word: opt=tight freq scf=tight

E (RB3LYP): -1420.73376210 hartree

**Table S2.** Atomic coordinates of optimized structure of **2a**.

| Center Number | Atomic Number | Atomic Type | Coordinates (Angstroms) |           |           |
|---------------|---------------|-------------|-------------------------|-----------|-----------|
|               |               |             | X                       | Y         | Z         |
| 1             | 6             | 0           | -1.031471               | 0.518026  | 1.835213  |
| 2             | 6             | 0           | 0.000000                | 0.000000  | 2.657300  |
| 3             | 6             | 0           | 1.031471                | -0.518026 | 1.835213  |
| 4             | 6             | 0           | 0.666483                | -0.330353 | 0.498029  |
| 5             | 6             | 0           | -0.666483               | 0.330353  | 0.498029  |
| 6             | 6             | 0           | 1.418543                | -0.695635 | -0.622725 |
| 7             | 6             | 0           | 1.137560                | -0.545347 | -1.976827 |
| 8             | 6             | 0           | 0.000000                | 0.000000  | -2.605620 |
| 9             | 6             | 0           | -1.137560               | 0.545347  | -1.976827 |
| 10            | 6             | 0           | -1.418543               | 0.695635  | -0.622725 |
| 11            | 7             | 0           | 0.000000                | 0.000000  | -4.032588 |
| 12            | 7             | 0           | 0.000000                | 0.000000  | 4.053197  |
| 13            | 6             | 0           | 0.408150                | -1.160281 | -4.746259 |
| 14            | 6             | 0           | 0.000000                | -2.435365 | -4.321835 |
| 15            | 6             | 0           | 0.407605                | -3.571379 | -5.018096 |
| 16            | 6             | 0           | 1.210776                | -3.458142 | -6.155084 |
| 17            | 6             | 0           | 1.611147                | -2.190923 | -6.584186 |
| 18            | 6             | 0           | 1.223656                | -1.049852 | -5.884230 |
| 19            | 6             | 0           | -0.408150               | 1.160281  | -4.746259 |
| 20            | 6             | 0           | -1.223656               | 1.049852  | -5.884230 |
| 21            | 6             | 0           | -1.611147               | 2.190923  | -6.584186 |
| 22            | 6             | 0           | -1.210776               | 3.458142  | -6.155084 |
| 23            | 6             | 0           | -0.407605               | 3.571379  | -5.018096 |
| 24            | 6             | 0           | 0.000000                | 2.435365  | -4.321835 |
| 25            | 6             | 0           | -1.225601               | 0.061628  | 4.779507  |
| 26            | 6             | 0           | -2.312812               | -0.748274 | 4.418502  |
| 27            | 6             | 0           | -3.506460               | -0.678565 | 5.135257  |
| 28            | 6             | 0           | -3.628703               | 0.181941  | 6.228246  |
| 29            | 6             | 0           | -2.543170               | 0.980109  | 6.595678  |
| 30            | 6             | 0           | -1.351253               | 0.928464  | 5.875578  |
| 31            | 6             | 0           | 1.225601                | -0.061628 | 4.779507  |
| 32            | 6             | 0           | 1.351253                | -0.928464 | 5.875578  |
| 33            | 6             | 0           | 2.543170                | -0.980109 | 6.595678  |
| 34            | 6             | 0           | 3.628703                | -0.181941 | 6.228246  |
| 35            | 6             | 0           | 3.506460                | 0.678565  | 5.135257  |
| 36            | 6             | 0           | 2.312812                | 0.748274  | 4.418502  |
| 37            | 1             | 0           | -1.942531               | 0.987766  | 2.181235  |
| 38            | 1             | 0           | 1.942531                | -0.987766 | 2.181235  |
| 39            | 1             | 0           | 2.385535                | -1.147182 | -0.402202 |
| 40            | 1             | 0           | 1.912874                | -0.889536 | -2.655173 |
| 41            | 1             | 0           | -1.912874               | 0.889536  | -2.655173 |
| 42            | 1             | 0           | -2.385535               | 1.147182  | -0.402202 |
| 43            | 1             | 0           | -0.635696               | -2.526724 | -3.446865 |
| 44            | 1             | 0           | 0.081994                | -4.550247 | -4.675806 |
| 45            | 1             | 0           | 1.520526                | -4.345696 | -6.699395 |
| 46            | 1             | 0           | 2.242496                | -2.087001 | -7.462831 |
| 47            | 1             | 0           | 1.549132                | -0.068326 | -6.213847 |
| 48            | 1             | 0           | -1.549132               | 0.068326  | -6.213847 |
| 49            | 1             | 0           | -2.242496               | 2.087001  | -7.462831 |
| 50            | 1             | 0           | -1.520526               | 4.345696  | -6.699395 |
| 51            | 1             | 0           | -0.081994               | 4.550247  | -4.675806 |
| 52            | 1             | 0           | 0.635696                | 2.526724  | -3.446865 |
| 53            | 1             | 0           | -2.214484               | -1.426975 | 3.577716  |
| 54            | 1             | 0           | -4.340054               | -1.312384 | 4.844208  |
| 55            | 1             | 0           | -4.558465               | 0.229038  | 6.788128  |
| 56            | 1             | 0           | -2.626083               | 1.657894  | 7.441254  |
| 57            | 1             | 0           | -0.512773               | 1.558211  | 6.155790  |
| 58            | 1             | 0           | 0.512773                | -1.558211 | 6.155790  |
| 59            | 1             | 0           | 2.626083                | -1.657894 | 7.441254  |
| 60            | 1             | 0           | 4.558465                | -0.229038 | 6.788128  |
| 61            | 1             | 0           | 4.340054                | 1.312384  | 4.844208  |
| 62            | 1             | 0           | 2.214484                | 1.426975  | 3.577716  |

Method: B3LYP/6-31G(d)  
Key word: opt=tight freq scf=tight  
E (RB3LYP): -1420.74296549 hartree

**Table S3.** Atomic coordinates of optimized structure of **2b**.

| Center Number | Atomic Number | Atomic Type | Coordinates (Angstroms) |           |           | Center Number | Atomic Number | Atomic Type | Coordinates (Angstroms) |           |           |
|---------------|---------------|-------------|-------------------------|-----------|-----------|---------------|---------------|-------------|-------------------------|-----------|-----------|
|               |               |             | X                       | Y         | Z         |               |               |             | X                       | Y         | Z         |
| 1             | 6             | 0           | 0.648261                | 0.362803  | 0.498648  | 41            | 8             | 0           | 1.617301                | 4.584289  | -6.826392 |
| 2             | 6             | 0           | -0.648261               | -0.362803 | 0.498648  | 42            | 6             | 0           | 2.483008                | 4.506133  | -7.945812 |
| 3             | 6             | 0           | -1.381032               | -0.762791 | -0.623817 | 43            | 8             | 0           | -1.617301               | -4.584289 | -6.826392 |
| 4             | 6             | 0           | -1.109505               | -0.599145 | -1.977712 | 44            | 6             | 0           | -2.483008               | -4.506133 | -7.945812 |
| 5             | 6             | 0           | 0.000000                | 0.000000  | -2.610936 | 45            | 1             | 0           | -2.325253               | -1.260727 | -0.403573 |
| 6             | 6             | 0           | 1.109505                | 0.599145  | -1.977712 | 46            | 1             | 0           | -1.869801               | -0.979560 | -2.653597 |
| 7             | 6             | 0           | 1.381032                | 0.762791  | -0.623817 | 47            | 1             | 0           | 1.869801                | 0.979560  | -2.653597 |
| 8             | 6             | 0           | 1.003913                | 0.569155  | 1.835986  | 48            | 1             | 0           | 2.325253                | 1.260727  | -0.403573 |
| 9             | 6             | 0           | 0.000000                | 0.000000  | 2.659557  | 49            | 1             | 0           | 0.385114                | 1.687551  | 6.084136  |
| 10            | 6             | 0           | -1.003913               | -0.569155 | 1.835986  | 50            | 1             | 0           | 2.447738                | 2.008543  | 7.382641  |
| 11            | 7             | 0           | 0.000000                | 0.000000  | -4.033605 | 51            | 1             | 0           | 4.432873                | -0.933914 | 4.954782  |
| 12            | 6             | 0           | 0.434652                | 1.147707  | -4.755564 | 52            | 1             | 0           | 2.332544                | -1.272505 | 3.662623  |
| 13            | 6             | 0           | -0.434652               | -1.147707 | -4.755564 | 53            | 1             | 0           | -0.385114               | -1.687551 | 6.084136  |
| 14            | 7             | 0           | 0.000000                | 0.000000  | 4.052389  | 54            | 1             | 0           | -2.447738               | -2.008543 | 7.382641  |
| 15            | 6             | 0           | -1.211576               | -0.190417 | 4.781738  | 55            | 1             | 0           | -4.432873               | 0.933914  | 4.954782  |
| 16            | 6             | 0           | 1.211576                | 0.190417  | 4.781738  | 56            | 1             | 0           | -2.332544               | 1.272505  | 3.662623  |
| 17            | 6             | 0           | 1.268821                | 1.108296  | 5.834862  | 57            | 1             | 0           | 1.638864                | 0.039881  | -6.151992 |
| 18            | 6             | 0           | 2.440795                | 1.288282  | 6.572379  | 58            | 1             | 0           | 2.363179                | 2.009419  | -7.428723 |
| 19            | 6             | 0           | 3.587387                | 0.554392  | 6.247948  | 59            | 1             | 0           | 0.087781                | 4.547559  | -4.807729 |
| 20            | 6             | 0           | 3.538769                | -0.364490 | 5.189140  | 60            | 1             | 0           | -0.669610               | 2.547170  | -3.540247 |
| 21            | 6             | 0           | 2.364698                | -0.551091 | 4.472727  | 61            | 1             | 0           | 0.669610                | -2.547170 | -3.540247 |
| 22            | 6             | 0           | -1.268821               | -1.108296 | 5.834862  | 62            | 1             | 0           | -0.087781               | -4.547559 | -4.807729 |
| 23            | 6             | 0           | -2.440795               | -1.288282 | 6.572379  | 63            | 1             | 0           | -2.363179               | -2.009419 | -7.428723 |
| 24            | 6             | 0           | -3.587387               | -0.554392 | 6.247948  | 64            | 1             | 0           | -1.638864               | -0.039881 | -6.151992 |
| 25            | 6             | 0           | -3.538769               | 0.364490  | 5.189140  | 65            | 1             | 0           | -5.918064               | -1.493256 | 8.333840  |
| 26            | 6             | 0           | -2.364698               | 0.551091  | 4.472727  | 66            | 1             | 0           | -4.197267               | -1.328810 | 8.781561  |
| 27            | 6             | 0           | 1.291751                | 1.024597  | -5.854836 | 67            | 1             | 0           | -4.707352               | -2.605456 | 7.636928  |
| 28            | 6             | 0           | 1.701660                | 2.145305  | -6.580607 | 68            | 1             | 0           | 5.918064                | 1.493256  | 8.333840  |
| 29            | 6             | 0           | 1.272313                | 3.420491  | -6.196933 | 69            | 1             | 0           | 4.197267                | 1.328810  | 8.781561  |
| 30            | 6             | 0           | 0.420649                | 3.553533  | -5.090020 | 70            | 1             | 0           | 4.707352                | 2.605456  | 7.636928  |
| 31            | 6             | 0           | 0.000000                | 2.433946  | -4.387070 | 71            | 1             | 0           | 2.626181                | 5.533127  | -8.287249 |
| 32            | 6             | 0           | 0.000000                | -2.433946 | -4.387070 | 72            | 1             | 0           | 2.042095                | 3.912839  | -8.758464 |
| 33            | 6             | 0           | -0.420649               | -3.553533 | -5.090020 | 73            | 1             | 0           | 3.456745                | 4.075601  | -7.675663 |
| 34            | 6             | 0           | -1.272313               | -3.420491 | -6.196933 | 74            | 1             | 0           | -2.626181               | -5.533127 | -8.287249 |
| 35            | 6             | 0           | -1.701660               | -2.145305 | -6.580607 | 75            | 1             | 0           | -2.042095               | -3.912839 | -8.758464 |
| 36            | 6             | 0           | -1.291751               | -1.024597 | -5.854836 | 76            | 1             | 0           | -3.456745               | -4.075601 | -7.675663 |
| 37            | 8             | 0           | -4.787718               | -0.654609 | 6.894588  | 77            | 1             | 0           | 1.890208                | 1.084811  | 2.181114  |
| 38            | 6             | 0           | -4.892836               | -1.574605 | 7.967685  | 78            | 1             | 0           | -1.890208               | -1.084811 | 2.181114  |
| 39            | 8             | 0           | 4.787718                | 0.654609  | 6.894588  |               |               |             |                         |           |           |
| 40            | 6             | 0           | 4.892836                | 1.574605  | 7.967685  |               |               |             |                         |           |           |

Method: B3LYP/6-31G(d)

Key word: opt=tight freq scf=tight

E (RB3LYP): -1878.82986742 hartree

**Table S4.** Atomic coordinates of optimized structure of **2a-Br<sub>2</sub>**.

| Center Number | Atomic Number | Atomic Type | Coordinates (Angstroms) |           |           |
|---------------|---------------|-------------|-------------------------|-----------|-----------|
|               |               |             | X                       | Y         | Z         |
| 1             | 6             | 0           | -1.067838               | 0.388849  | -1.326819 |
| 2             | 6             | 0           | 0.000000                | 0.000000  | -2.171568 |
| 3             | 6             | 0           | 1.067838                | -0.388849 | -1.326819 |
| 4             | 6             | 0           | 0.693524                | -0.257617 | 0.017913  |
| 5             | 6             | 0           | -0.693524               | 0.257617  | 0.017913  |
| 6             | 6             | 0           | 1.476763                | -0.545678 | 1.137657  |
| 7             | 6             | 0           | 1.182954                | -0.440450 | 2.490461  |
| 8             | 6             | 0           | 0.000000                | 0.000000  | 3.126639  |
| 9             | 6             | 0           | -1.182954               | 0.440450  | 2.490461  |
| 10            | 6             | 0           | -1.476763               | 0.545678  | 1.137657  |
| 11            | 7             | 0           | 0.000000                | 0.000000  | 4.540314  |
| 12            | 7             | 0           | 0.000000                | 0.000000  | -3.570497 |
| 13            | 6             | 0           | 1.178145                | 0.337367  | 5.272612  |
| 14            | 6             | 0           | 1.925295                | 1.474729  | 4.930177  |
| 15            | 6             | 0           | 3.070086                | 1.803135  | 5.653807  |
| 16            | 6             | 0           | 3.474200                | 1.017194  | 6.735428  |
| 17            | 6             | 0           | 2.725154                | -0.108630 | 7.083697  |
| 18            | 6             | 0           | 1.587964                | -0.454203 | 6.355365  |
| 19            | 6             | 0           | -1.178145               | -0.337367 | 5.272612  |
| 20            | 6             | 0           | -1.587964               | 0.454203  | 6.355365  |
| 21            | 6             | 0           | -2.725154               | 0.108630  | 7.083697  |
| 22            | 6             | 0           | -3.474200               | -1.017194 | 6.735428  |
| 23            | 6             | 0           | -3.070086               | -1.803135 | 5.653807  |
| 24            | 6             | 0           | -1.925295               | -1.474729 | 4.930177  |
| 25            | 6             | 0           | -0.385148               | 1.177466  | -4.272572 |
| 26            | 6             | 0           | 0.000000                | 2.437350  | -3.792661 |
| 27            | 6             | 0           | -0.387314               | 3.592786  | -4.468998 |
| 28            | 6             | 0           | -1.144392               | 3.510786  | -5.638641 |
| 29            | 6             | 0           | -1.520518               | 2.254809  | -6.121441 |
| 30            | 6             | 0           | -1.154408               | 1.094987  | -5.443248 |
| 31            | 6             | 0           | 0.385148                | -1.177466 | -4.272572 |
| 32            | 6             | 0           | 1.154408                | -1.094987 | -5.443248 |
| 33            | 6             | 0           | 1.520518                | -2.254809 | -6.121441 |
| 34            | 6             | 0           | 1.144392                | -3.510786 | -5.638641 |
| 35            | 6             | 0           | 0.387314                | -3.592786 | -4.468998 |
| 36            | 6             | 0           | 0.000000                | -2.437350 | -3.792661 |
| 37            | 1             | 0           | 2.466607                | -0.935686 | 0.907509  |
| 38            | 1             | 0           | 1.971598                | -0.765968 | 3.160914  |
| 39            | 1             | 0           | -1.971598               | 0.765968  | 3.160914  |
| 40            | 1             | 0           | -2.466607               | 0.935686  | 0.907509  |
| 41            | 1             | 0           | 1.603549                | 2.095022  | 4.099374  |
| 42            | 1             | 0           | 3.639687                | 2.686567  | 5.378269  |
| 43            | 1             | 0           | 4.363013                | 1.280473  | 7.301587  |
| 44            | 1             | 0           | 3.032187                | -0.730774 | 7.920068  |
| 45            | 1             | 0           | 1.012114                | -1.335255 | 6.620670  |
| 46            | 1             | 0           | -1.012114               | 1.335255  | 6.620670  |
| 47            | 1             | 0           | -3.032187               | 0.730774  | 7.920068  |
| 48            | 1             | 0           | -4.363013               | -1.280473 | 7.301587  |
| 49            | 1             | 0           | -3.639687               | -2.686567 | 5.378269  |
| 50            | 1             | 0           | -1.603549               | -2.095022 | 4.099374  |
| 51            | 1             | 0           | 0.605216                | 2.503115  | -2.894050 |
| 52            | 1             | 0           | -0.082101               | 4.562114  | -4.083511 |
| 53            | 1             | 0           | -1.438625               | 4.412984  | -6.167366 |
| 54            | 1             | 0           | -2.118134               | 2.175124  | -7.025875 |
| 55            | 1             | 0           | -1.467238               | 0.123177  | -5.810457 |
| 56            | 1             | 0           | 1.467238                | -0.123177 | -5.810457 |
| 57            | 1             | 0           | 2.118134                | -2.175124 | -7.025875 |
| 58            | 1             | 0           | 1.438625                | -4.412984 | -6.167366 |
| 59            | 1             | 0           | 0.082101                | -4.562114 | -4.083511 |
| 60            | 1             | 0           | -0.605216               | -2.503115 | -2.894050 |
| 61            | 35            | 0           | -2.771073               | 0.940915  | -1.924090 |
| 62            | 35            | 0           | 2.771073                | -0.940915 | -1.924090 |

Method: B3LYP/6-31G(d)

Key word: opt=tight freq scf=tight

E (RB3LYP): -6562.95012330 hartree



**Table S5.** Atomic coordinates of optimized structure of **2b-Br<sub>2</sub>**.

| Center Number | Atomic Number | Atomic Type | Coordinates (Angstroms) |           |           | Center Number | Atomic Number | Atomic Type | Coordinates (Angstroms) |           |           |
|---------------|---------------|-------------|-------------------------|-----------|-----------|---------------|---------------|-------------|-------------------------|-----------|-----------|
|               |               |             | X                       | Y         | Z         |               |               |             | X                       | Y         | Z         |
| 1             | 6             | 0           | 0.000000                | 0.738844  | -0.146812 | 41            | 1             | 0           | 0.457627                | -1.459415 | -5.944206 |
| 2             | 6             | 0           | 0.000000                | -0.738844 | -0.146812 | 42            | 1             | 0           | -1.209670               | -2.835000 | -7.170526 |
| 3             | 6             | 0           | 0.002203                | -1.572448 | 0.974886  | 43            | 1             | 0           | -4.214775               | -1.731277 | -4.300211 |
| 4             | 6             | 0           | -0.000884               | -1.261820 | 2.327208  | 44            | 1             | 0           | -2.573804               | -0.334011 | -3.119964 |
| 5             | 6             | 0           | 0.000000                | 0.000000  | 2.967746  | 45            | 1             | 0           | -0.457627               | 1.459415  | -5.944206 |
| 6             | 6             | 0           | 0.000884                | 1.261820  | 2.327208  | 46            | 1             | 0           | 1.209670                | 2.835000  | -7.170526 |
| 7             | 6             | 0           | -0.002203               | 1.572448  | 0.974886  | 47            | 1             | 0           | 4.214775                | 1.731277  | -4.300211 |
| 8             | 6             | 0           | -0.007641               | 1.135350  | -1.491411 | 48            | 1             | 0           | 2.573804                | 0.334011  | -3.119964 |
| 9             | 6             | 0           | 0.000000                | 0.000000  | -2.339392 | 49            | 1             | 0           | 1.014199                | 1.435341  | 6.394107  |
| 10            | 6             | 0           | 0.007641                | -1.135350 | -1.491411 | 50            | 1             | 0           | -0.133776               | 3.166779  | 7.709483  |
| 11            | 7             | 0           | 0.000000                | 0.000000  | 4.377606  | 51            | 1             | 0           | -3.676043               | 2.626577  | 5.330169  |
| 12            | 6             | 0           | -0.665274               | 1.027330  | 5.115206  | 52            | 1             | 0           | -2.517659               | 0.855163  | 4.022233  |
| 13            | 6             | 0           | 0.665274                | -1.027330 | 5.115206  | 53            | 1             | 0           | 2.517659                | -0.855163 | 4.022233  |
| 14            | 7             | 0           | 0.000000                | 0.000000  | -3.735650 | 54            | 1             | 0           | 3.676043                | -2.626577 | 5.330169  |
| 15            | 6             | 0           | 0.944718                | 0.797335  | -4.443816 | 55            | 1             | 0           | 0.133776                | -3.166779 | 7.709483  |
| 16            | 6             | 0           | -0.944718               | -0.797335 | -4.443816 | 56            | 1             | 0           | -1.014199               | -1.435341 | 6.394107  |
| 17            | 6             | 0           | -0.568421               | -1.510609 | -5.594796 | 57            | 8             | 0           | 3.646616                | 3.174706  | -6.568861 |
| 18            | 6             | 0           | -1.494517               | -2.281214 | -6.281234 | 58            | 8             | 0           | -3.646616               | -3.174706 | -6.568861 |
| 19            | 6             | 0           | -2.817940               | -2.379419 | -5.825339 | 59            | 8             | 0           | -2.722099               | 3.962781  | 7.256575  |
| 20            | 6             | 0           | -3.198993               | -1.680794 | -4.675603 | 60            | 8             | 0           | 2.722099                | -3.962781 | 7.256575  |
| 21            | 6             | 0           | -2.267420               | -0.887852 | -4.001882 | 61            | 6             | 0           | 4.992791                | 3.309072  | -6.148250 |
| 22            | 6             | 0           | 0.568421                | 1.510609  | -5.594796 | 62            | 1             | 0           | 5.518249                | 2.344317  | -6.156696 |
| 23            | 6             | 0           | 1.494517                | 2.281214  | -6.281234 | 63            | 1             | 0           | 5.466465                | 3.982424  | -6.865407 |
| 24            | 6             | 0           | 2.817940                | 2.379419  | -5.825339 | 64            | 1             | 0           | 5.061424                | 3.745012  | -5.142266 |
| 25            | 6             | 0           | 3.198993                | 1.680794  | -4.675603 | 65            | 6             | 0           | -4.992791               | -3.309072 | -6.148250 |
| 26            | 6             | 0           | 2.267420                | 0.887852  | -4.001882 | 66            | 1             | 0           | -5.518249               | -2.344317 | -6.156696 |
| 27            | 6             | 0           | -0.014089               | 1.691790  | 6.158465  | 67            | 1             | 0           | -5.466465               | -3.982424 | -6.865407 |
| 28            | 6             | 0           | -0.668044               | 2.673759  | 6.905464  | 68            | 1             | 0           | -5.061424               | -3.745012 | -5.142266 |
| 29            | 6             | 0           | -1.990343               | 3.016593  | 6.599890  | 69            | 6             | 0           | -2.106417               | 4.664954  | 8.324589  |
| 30            | 6             | 0           | -2.647834               | 2.356831  | 5.549722  | 70            | 1             | 0           | -1.229149               | 5.230555  | 7.983556  |
| 31            | 6             | 0           | -1.997588               | 1.369118  | 4.824759  | 71            | 1             | 0           | -2.859735               | 5.360091  | 8.699451  |
| 32            | 6             | 0           | 1.997588                | -1.369118 | 4.824759  | 72            | 1             | 0           | -1.805004               | 3.986113  | 9.133536  |
| 33            | 6             | 0           | 2.647834                | -2.356831 | 5.549722  | 73            | 6             | 0           | 2.106417                | -4.664954 | 8.324589  |
| 34            | 6             | 0           | 1.990343                | -3.016593 | 6.599890  | 74            | 1             | 0           | 1.229149                | -5.230555 | 7.983556  |
| 35            | 6             | 0           | 0.668044                | -2.673759 | 6.905464  | 75            | 1             | 0           | 2.859735                | -5.360091 | 8.699451  |
| 36            | 6             | 0           | 0.014089                | -1.691790 | 6.158465  | 76            | 1             | 0           | 1.805004                | -3.986113 | 9.133536  |
| 37            | 1             | 0           | -0.018990               | -2.636278 | 0.744951  | 77            | 35            | 0           | -0.088584               | 2.927127  | -2.084958 |
| 38            | 1             | 0           | -0.031619               | -2.116098 | 2.995393  | 78            | 35            | 0           | 0.088584                | -2.927127 | -2.084958 |
| 39            | 1             | 0           | 0.031619                | 2.116098  | 2.995393  |               |               |             |                         |           |           |
| 40            | 1             | 0           | 0.018990                | 2.636278  | 0.744951  |               |               |             |                         |           |           |

Method: B3LYP/6-31G(d)

Key word: opt=tight freq scf=tight

E (RB3LYP): -7021.03778041 hartree

**Table S6.** Atomic coordinates of optimized structure of **3a**.

| Center Number | Atomic Number | Atomic Type | Coordinates (Angstroms) |           |           | Center Number | Atomic Number | Atomic Type | Coordinates (Angstroms) |           |           |
|---------------|---------------|-------------|-------------------------|-----------|-----------|---------------|---------------|-------------|-------------------------|-----------|-----------|
|               |               |             | X                       | Y         | Z         |               |               |             | X                       | Y         | Z         |
| 1             | 6             | 0           | 0.000000                | 0.741465  | -0.201796 | 36            | 6             | 0           | 0.270312                | -1.603885 | 6.151281  |
| 2             | 6             | 0           | 0.000000                | -0.741465 | -0.201796 | 37            | 6             | 0           | -1.176302               | 2.940886  | -2.544000 |
| 3             | 6             | 0           | -0.011544               | -1.582576 | 0.908516  | 38            | 6             | 0           | 1.176302                | -2.940886 | -2.544000 |
| 4             | 6             | 0           | -0.016897               | -1.265612 | 2.264116  | 39            | 1             | 0           | -0.048190               | -2.644893 | 0.672784  |
| 5             | 6             | 0           | 0.000000                | 0.000000  | 2.890440  | 40            | 1             | 0           | -0.057831               | -2.112793 | 2.941532  |
| 6             | 6             | 0           | 0.016897                | 1.265612  | 2.264116  | 41            | 1             | 0           | 0.057831                | 2.112793  | 2.941532  |
| 7             | 6             | 0           | 0.011544                | 1.582576  | 0.908516  | 42            | 1             | 0           | 0.048190                | 2.644893  | 0.672784  |
| 8             | 6             | 0           | -0.007906               | 1.147881  | -1.544338 | 43            | 1             | 0           | 0.561407                | -1.302825 | -6.067099 |
| 9             | 6             | 0           | 0.000000                | 0.000000  | -2.384847 | 44            | 1             | 0           | -0.934426               | -2.845299 | -7.283947 |
| 10            | 6             | 0           | 0.007906                | -1.147881 | -1.544338 | 45            | 1             | 0           | -3.214247               | -3.339651 | -6.407780 |
| 11            | 7             | 0           | 0.000000                | 0.000000  | 4.312768  | 46            | 1             | 0           | -3.968429               | -2.261047 | -4.292103 |
| 12            | 6             | 0           | -0.795688               | 0.934506  | 5.035118  | 47            | 1             | 0           | -2.475826               | -0.703986 | -3.085261 |
| 13            | 6             | 0           | 0.795688                | -0.934506 | 5.035118  | 48            | 1             | 0           | -0.561407               | 1.302825  | -6.067099 |
| 14            | 7             | 0           | 0.000000                | 0.000000  | -3.789335 | 49            | 1             | 0           | 0.934426                | 2.845299  | -7.283947 |
| 15            | 6             | 0           | 0.858025                | 0.891624  | -4.494810 | 50            | 1             | 0           | 3.968429                | 2.261047  | -4.292103 |
| 16            | 6             | 0           | -0.858025               | -0.891624 | -4.494810 | 51            | 1             | 0           | 2.475826                | 0.703986  | -3.085261 |
| 17            | 6             | 0           | -0.432065               | -1.509053 | -5.682365 | 52            | 1             | 0           | 0.754832                | 1.413639  | 6.452758  |
| 18            | 6             | 0           | -1.281067               | -2.377085 | -6.366214 | 53            | 1             | 0           | -0.638031               | 3.015079  | 7.726640  |
| 19            | 6             | 0           | -2.557533               | -2.657915 | -5.874874 | 54            | 1             | 0           | -2.983875               | 3.470505  | 7.025034  |
| 20            | 6             | 0           | -2.977826               | -2.053731 | -4.688382 | 55            | 1             | 0           | -3.919682               | 2.290464  | 5.041398  |
| 21            | 6             | 0           | -2.142378               | -1.173066 | -4.005177 | 56            | 1             | 0           | -2.533150               | 0.667237  | 3.788449  |
| 22            | 6             | 0           | 0.432065                | 1.509053  | -5.682365 | 57            | 1             | 0           | 2.533150                | -0.667237 | 3.788449  |
| 23            | 6             | 0           | 1.281067                | 2.377085  | -6.366214 | 58            | 1             | 0           | 3.919682                | -2.290464 | 5.041398  |
| 24            | 6             | 0           | 2.557533                | 2.657915  | -5.874874 | 59            | 1             | 0           | 2.983875                | -3.470505 | 7.025034  |
| 25            | 6             | 0           | 2.977826                | 2.053731  | -4.688382 | 60            | 1             | 0           | 0.638031                | -3.015079 | 7.726640  |
| 26            | 6             | 0           | 2.142378                | 1.173066  | -4.005177 | 61            | 1             | 0           | -0.754832               | -1.413639 | 6.452758  |
| 27            | 6             | 0           | -0.270312               | 1.603885  | 6.151281  | 62            | 1             | 0           | -1.007297               | 3.998485  | -2.760070 |
| 28            | 6             | 0           | -1.059537               | 2.504184  | 6.864928  | 63            | 1             | 0           | -2.026648               | 2.835883  | -1.857368 |
| 29            | 6             | 0           | -2.373644               | 2.763573  | 6.470186  | 64            | 1             | 0           | -1.397822               | 2.413880  | -3.479018 |
| 30            | 6             | 0           | -2.895901               | 2.104158  | 5.355072  | 65            | 1             | 0           | 1.007297                | -3.998485 | -2.760070 |
| 31            | 6             | 0           | -2.120328               | 1.189472  | 4.645749  | 66            | 1             | 0           | 2.026648                | -2.835883 | -1.857368 |
| 32            | 6             | 0           | 2.120328                | -1.189472 | 4.645749  | 67            | 1             | 0           | 1.397822                | -2.413880 | -3.479018 |
| 33            | 6             | 0           | 2.895901                | -2.104158 | 5.355072  | 68            | 1             | 0           | 3.214247                | 3.339651  | -6.407780 |
| 34            | 6             | 0           | 2.373644                | -2.763573 | 6.470186  | 69            | 8             | 0           | 0.026538                | 2.458593  | -1.940351 |
| 35            | 6             | 0           | 1.059537                | -2.504184 | 6.864928  | 70            | 8             | 0           | -0.026538               | -2.458593 | -1.940351 |

Method: B3LYP/6-31G(d)

Key word: opt=tight freq scf=tight

E (RB3LYP): -1649.77084668 hartree

**Table S7.** Atomic coordinates of optimized structure of **3b**.

| Center Number | Atomic Number | Atomic Type | Coordinates (Angstroms) |           |           | Center Number | Atomic Number | Atomic Type | Coordinates (Angstroms) |           |           |
|---------------|---------------|-------------|-------------------------|-----------|-----------|---------------|---------------|-------------|-------------------------|-----------|-----------|
|               |               |             | X                       | Y         | Z         |               |               |             | X                       | Y         | Z         |
| 1             | 6             | 0           | 0.000000                | 0.740129  | -0.342261 | 46            | 1             | 0           | -2.469976               | -0.789329 | -3.273262 |
| 2             | 6             | 0           | 0.000000                | -0.740129 | -0.342261 | 47            | 1             | 0           | -0.636016               | 1.305100  | -6.193923 |
| 3             | 6             | 0           | -0.015942               | -1.579977 | 0.770272  | 48            | 1             | 0           | 0.801575                | 2.910321  | -7.424443 |
| 4             | 6             | 0           | -0.022409               | -1.264998 | 2.125344  | 49            | 1             | 0           | 3.884152                | 2.395956  | -4.472644 |
| 5             | 6             | 0           | 0.000000                | 0.000000  | 2.757098  | 50            | 1             | 0           | 2.469976                | 0.789329  | -3.273262 |
| 6             | 6             | 0           | 0.022409                | 1.264998  | 2.125344  | 51            | 1             | 0           | 0.934688                | 1.430177  | 6.233232  |
| 7             | 6             | 0           | 0.015942                | 1.579977  | 0.770272  | 52            | 1             | 0           | -0.278965               | 3.123527  | 7.537313  |
| 8             | 6             | 0           | -0.009640               | 1.146925  | -1.684499 | 53            | 1             | 0           | -3.746304               | 2.547698  | 5.059290  |
| 9             | 6             | 0           | 0.000000                | 0.000000  | -2.528308 | 54            | 1             | 0           | -2.521825               | 0.812485  | 3.763249  |
| 10            | 6             | 0           | 0.009640                | -1.146925 | -1.684499 | 55            | 1             | 0           | 2.521825                | -0.812485 | 3.763249  |
| 11            | 7             | 0           | 0.000000                | 0.000000  | 4.174300  | 56            | 1             | 0           | 3.746304                | -2.547698 | 5.059290  |
| 12            | 6             | 0           | -0.702473               | 1.002367  | 4.906534  | 57            | 1             | 0           | 0.278965                | -3.123527 | 7.537313  |
| 13            | 6             | 0           | 0.702473                | -1.002367 | 4.906534  | 58            | 1             | 0           | -0.934688               | -1.430177 | 6.233232  |
| 14            | 7             | 0           | 0.000000                | 0.000000  | -3.930232 | 59            | 1             | 0           | -1.030048               | 3.999700  | -2.878306 |
| 15            | 6             | 0           | 0.817825                | 0.925043  | -4.642439 | 60            | 1             | 0           | -2.032300               | 2.831096  | -1.964035 |
| 16            | 6             | 0           | -0.817825               | -0.925043 | -4.642439 | 61            | 1             | 0           | -1.425848               | 2.415938  | -3.595929 |
| 17            | 6             | 0           | -0.355483               | -1.539732 | -5.820190 | 62            | 1             | 0           | 1.030048                | -3.999700 | -2.878306 |
| 18            | 6             | 0           | -1.155819               | -2.436224 | -6.514245 | 63            | 1             | 0           | 2.032300                | -2.831096 | -1.964035 |
| 19            | 6             | 0           | -2.435108               | -2.762006 | -6.041994 | 64            | 1             | 0           | 1.425848                | -2.415938 | -3.595929 |
| 20            | 6             | 0           | -2.900570               | -2.165199 | -4.865872 | 65            | 8             | 0           | 0.020152                | 2.460000  | -2.078563 |
| 21            | 6             | 0           | -2.098469               | -1.249087 | -4.183361 | 66            | 8             | 0           | -0.020152               | -2.460000 | -2.078563 |
| 22            | 6             | 0           | 0.355483                | 1.539732  | -5.820190 | 67            | 8             | 0           | 3.137514                | 3.663677  | -6.794928 |
| 23            | 6             | 0           | 1.155819                | 2.436224  | -6.514245 | 68            | 8             | 0           | -3.137514               | -3.663677 | -6.794928 |
| 24            | 6             | 0           | 2.435108                | 2.762006  | -6.041994 | 69            | 8             | 0           | -2.870053               | 3.878837  | 7.027061  |
| 25            | 6             | 0           | 2.900570                | 2.165199  | -4.865872 | 70            | 8             | 0           | 2.870053                | -3.878837 | 7.027061  |
| 26            | 6             | 0           | 2.098469                | 1.249087  | -4.183361 | 71            | 6             | 0           | 4.429894                | 4.037688  | -6.351046 |
| 27            | 6             | 0           | -0.092159               | 1.668737  | 5.973876  | 72            | 1             | 0           | 5.111877                | 3.177084  | -6.314817 |
| 28            | 6             | 0           | -0.783638               | 2.629837  | 6.714672  | 73            | 1             | 0           | 4.801610                | 4.759453  | -7.081128 |
| 29            | 6             | 0           | -2.103027               | 2.952600  | 6.378418  | 74            | 1             | 0           | 4.397035                | 4.509756  | -5.359689 |
| 30            | 6             | 0           | -2.719477               | 2.293840  | 5.303509  | 75            | 6             | 0           | -4.429894               | -4.037688 | -6.351046 |
| 31            | 6             | 0           | -2.032832               | 1.325824  | 4.585303  | 76            | 1             | 0           | -5.111877               | -3.177084 | -6.314817 |
| 32            | 6             | 0           | 2.032832                | -1.325824 | 4.585303  | 77            | 1             | 0           | -4.801610               | -4.759453 | -7.081128 |
| 33            | 6             | 0           | 2.719477                | -2.293840 | 5.303509  | 78            | 1             | 0           | -4.397035               | -4.509756 | -5.359689 |
| 34            | 6             | 0           | 2.103027                | -2.952600 | 6.378418  | 79            | 6             | 0           | -2.296401               | 4.573086  | 8.122105  |
| 35            | 6             | 0           | 0.783638                | -2.629837 | 6.714672  | 80            | 1             | 0           | -1.420106               | 5.159924  | 7.815416  |
| 36            | 6             | 0           | 0.092159                | -1.668737 | 5.973876  | 81            | 1             | 0           | -3.071558               | 5.248866  | 8.488248  |
| 37            | 6             | 0           | -1.192014               | 2.940705  | -2.662475 | 82            | 1             | 0           | -2.004279               | 3.886409  | 8.928090  |
| 38            | 6             | 0           | 1.192014                | -2.940705 | -2.662475 | 83            | 6             | 0           | 2.296401                | -4.573086 | 8.122105  |
| 39            | 1             | 0           | -0.055649               | -2.642392 | 0.534856  | 84            | 1             | 0           | 1.420106                | -5.159924 | 7.815416  |
| 40            | 1             | 0           | -0.069935               | -2.114271 | 2.799399  | 85            | 1             | 0           | 3.071558                | -5.248866 | 8.488248  |
| 41            | 1             | 0           | 0.069935                | 2.114271  | 2.799399  | 86            | 1             | 0           | 2.004279                | -3.886409 | 8.928090  |
| 42            | 1             | 0           | 0.055649                | 2.642392  | 0.534856  |               |               |             |                         |           |           |
| 43            | 1             | 0           | 0.636016                | -1.305100 | -6.193923 |               |               |             |                         |           |           |
| 44            | 1             | 0           | -0.801575               | -2.910321 | -7.424443 |               |               |             |                         |           |           |
| 45            | 1             | 0           | -3.884152               | -2.395956 | -4.472644 |               |               |             |                         |           |           |

Method: B3LYP/6-31G(d)

Key word: opt=tight freq scf=tight

E (RB3LYP): -2107.85752492 hartree

**Complete list of authors of Gaussian 09**

*Gaussian 09, revision B.01*; M. J. Frisch, G. W. Trucks, H. B. Schlegel, G. E. Scuseria, M. A. Robb, J. R. Cheeseman, G. Scalmani, V. Barone, B. Mennucci, G. A. Petersson, H. Nakatsuji, M. Caricato, X. Li, H. P. Hratchian, A. F. Izmaylov, J. Bloino, G. Zheng, J. L. Sonnenberg, M. Hada, M. Ehara, K. Toyota, R. Fukuda, J. Hasegawa, M. Ishida, T. Nakajima, Y. Honda, O. Kitao, H. Nakai, T. Vreven, J. A. Montgomery, Jr., J. E. Peralta, F. Ogliaro, M. Bearpark, J. J. Heyd, E. Brothers, K. N. Kudin, V. N. Staroverov, T. Keith, R. Kobayashi, J. Normand, K. Raghavachari, A. Rendell, J. C. Burant, S. S. Iyengar, J. Tomasi, M. Cossi, N. Rega, J. M. Millam, M. Klene, J. E. Knox, J. B. Cross, V. Bakken, C. Adamo, J. Jaramillo, R. Gomperts, R. E. Stratmann, O. Yazyev, A. J. Austin, R. Cammi, C. Pomelli, J. W. Ochterski, R. L. Martin, K. Morokuma, V. G. Zakrzewski, G. A. Voth, P. Salvador, J. J. Dannenberg, S. Dapprich, A. D. Daniels, O. Farkas, J. B. Foresman, J. V. Ortiz, J. Cioslowski, and D. J. Fox, Gaussian, Inc., Wallingford CT, 2010.

**Table S8** Redox Potentials (V)<sup>a</sup> and HOMO and LUMO levels (eV)<sup>b</sup> of azulene, **2**, **2-Br<sub>2</sub>** and **3**

| Compd                    | <sup>ox</sup> $E_1^c$ | <sup>red</sup> $E_1^c$ | <sup>ox</sup> $E_{1(\text{onset})}^c$ | <sup>red</sup> $E_{1(\text{onset})}^c$ | HOMO <sup>b</sup> | LUMO <sup>b</sup> |
|--------------------------|-----------------------|------------------------|---------------------------------------|----------------------------------------|-------------------|-------------------|
| azulene                  | 0.50                  | -2.15                  | 0.32                                  | -2.02                                  | -5.12             | -2.78             |
| <b>2a</b>                | 0.03                  | -2.16                  | -0.11                                 | -2.03                                  | -4.69             | -2.77             |
| <b>2b</b>                | -0.12                 | -2.28                  | -0.29                                 | -2.15                                  | -4.51             | -2.65             |
| <b>2a-Br<sub>2</sub></b> | 0.36                  | -1.82                  | 0.24                                  | -1.69                                  | -5.04             | -3.11             |
| <b>2b-Br<sub>2</sub></b> | 0.10                  | -1.94                  | -0.02                                 | -1.81                                  | -4.78             | -2.99             |
| <b>3a</b>                | -0.07                 | -2.08                  | -0.20                                 | -1.96                                  | -4.60             | -2.84             |
| <b>3b</b>                | -0.14                 | -2.16                  | -0.26                                 | -2.04                                  | -4.54             | -2.76             |

<sup>a</sup> Vs. ferrocene/ferrocenium (Fc/Fc<sup>+</sup>) couple. <sup>b</sup> Conversion potential of ferrocene as Ip = -4.8 eV.<sup>ref.</sup>

<sup>c</sup> Conditions: solvent, PhCN; supporting electrolyte, <sup>n</sup>Bu<sub>4</sub>NPF<sub>6</sub>; reference electrode, Ag/Ag<sup>+</sup>; counter electrode, Pt; working electrode, Pt wire.

ref.: M. M.-Olvera, R. A.-Ramos, M. M.-Domínguez, L. Salmon, G. Molnár, A. Bousseksou, M. P. C.-Castro, *New J. Chem.*, 2022, **46**, 4992-5001.

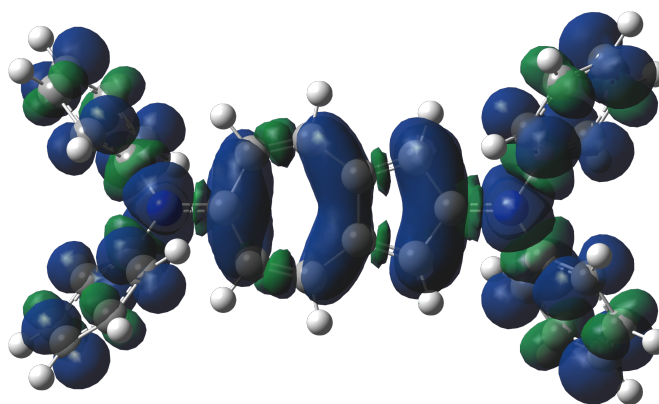

**Figure S17.** Spin density plot of radical cation of **2a** calculated at B3LYP/6-31G\* level.

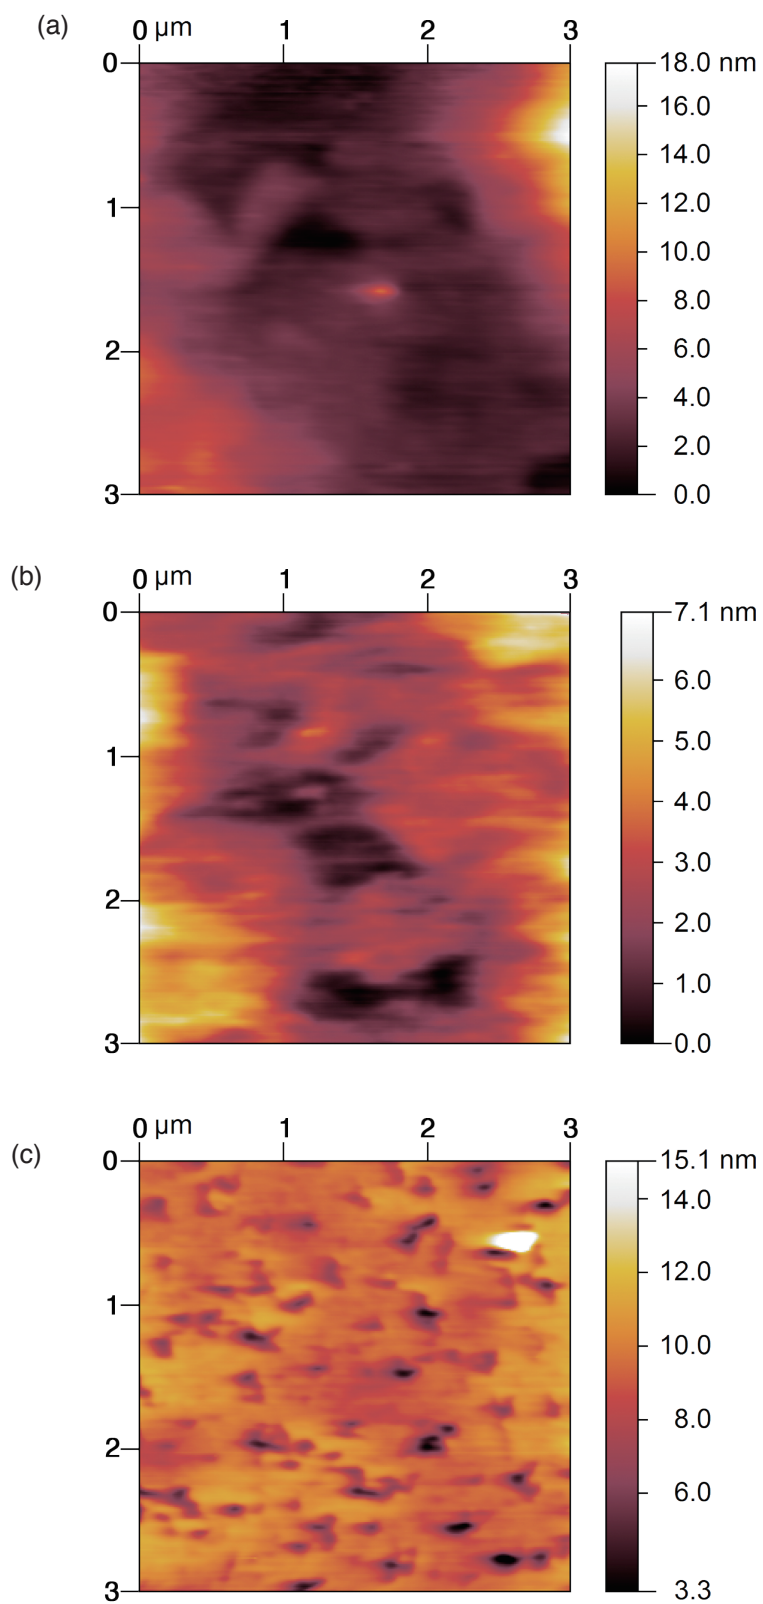

**Figure S18.** AFM images of (a) **2a**, (b) **2a-Br<sub>2</sub>** and (c) **2b** thin films.
